# Supplementary material for: De novo 3D models of SARS-CoV-2 RNA elements from consensus experimental secondary structures
Source: PubMed Central journal article supplement (PMC8034642; doi:10.1093/nar/gkab119), 2021-03-08
Supplement: gkab119_supplemental_file.pdf [file gkab119_supplemental_file.pdf]

## **Supplemental Information for: “De novo 3D models of SARS-CoV-2 RNA elements from consensus experimental secondary structures”**

Ramya Rangan<sup>1\*</sup>, Andrew M. Watkins<sup>2\*</sup>, Jose Chacon<sup>2</sup>, Rachael Kretsch<sup>1</sup>, Wipapat Kladwang<sup>2</sup>, Ivan N. Zheludev<sup>2</sup>, Jill Townley<sup>3</sup>, Mats Rynge<sup>4</sup>, Gregory Thain<sup>5</sup>, Rhiju Das<sup>1,2,6†</sup>

<sup>1</sup> Biophysics Program, Stanford University, Stanford CA 94305

<sup>2</sup> Department of Biochemistry, Stanford University School of Medicine, Stanford CA 94305

<sup>3</sup> Eterna Massive Open Laboratory

<sup>4</sup> Information Sciences Institute, University of Southern California, Marina Del Rey, CA 90292, USA

<sup>5</sup> Department of Computer Sciences, University of Wisconsin–Madison, Madison, WI 53706 USA

<sup>6</sup> Department of Physics, Stanford University, Stanford CA 94305

\* Equally contributing lead authors.

† Corresponding author: [rhiju@stanford.edu](mailto:rhiju@stanford.edu)

This supplemental information contains 8 Supplementary Figures and 4 Supplementary Tables.

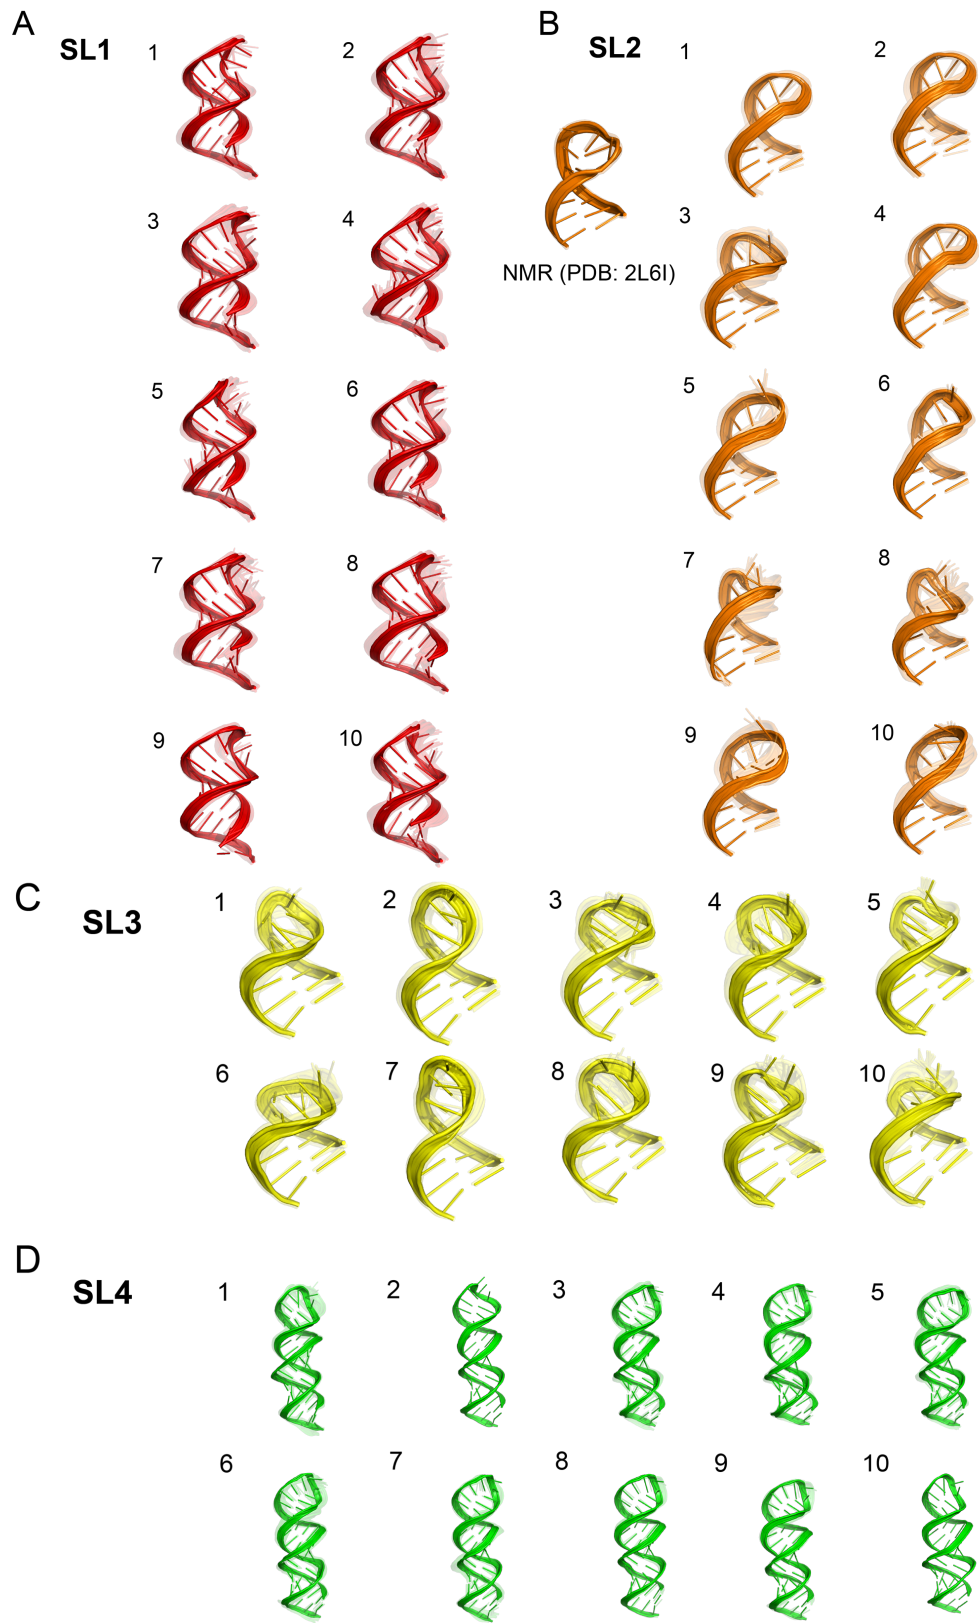



E

SL6

1

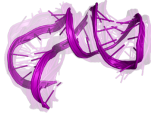

2

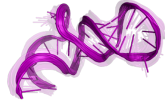

3

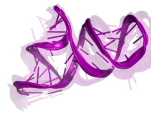

4

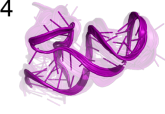

5

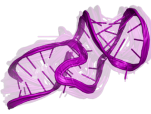

6

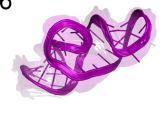

7

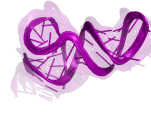

8

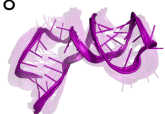

9

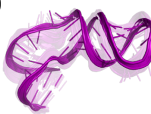

10

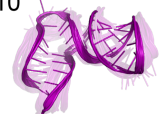

F

SL7

1

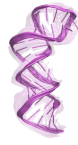

2

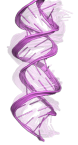

3

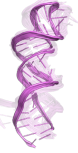

4

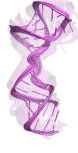

5

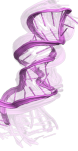

6

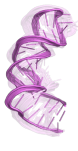

7

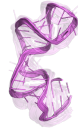

8

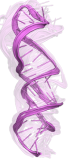

9

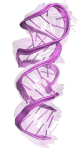

10

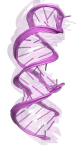

G

SL8

1

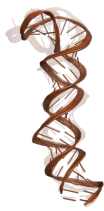

2

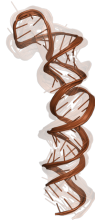

3

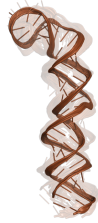

4

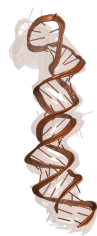

5

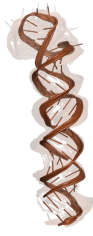

6

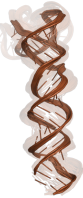

7

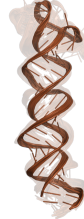

8

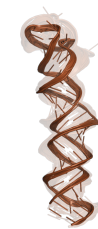

9

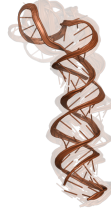

10

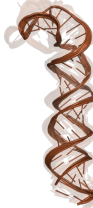

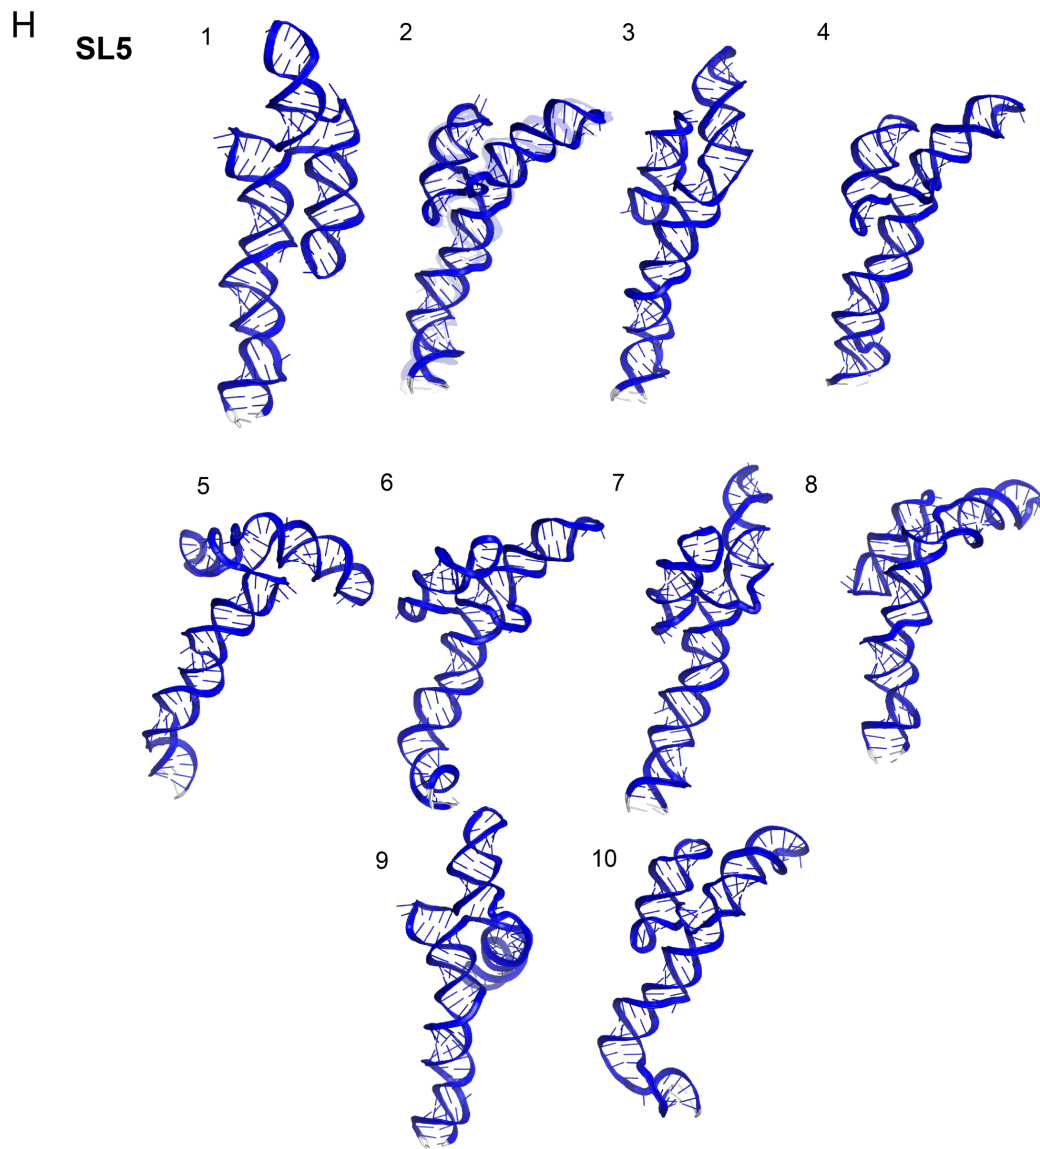

**Supplementary Figure 1.** *Models for the extended 5' UTR.* Top 10 clusters are depicted for segments of the extended 5' UTR: A) SL1, B) SL2, C) SL3, D) SL4, E) SL6, F) SL7, G) SL8, and H) SL5. Models are colored analogously to the secondary structure in Fig. 1.

# A 5' UTR

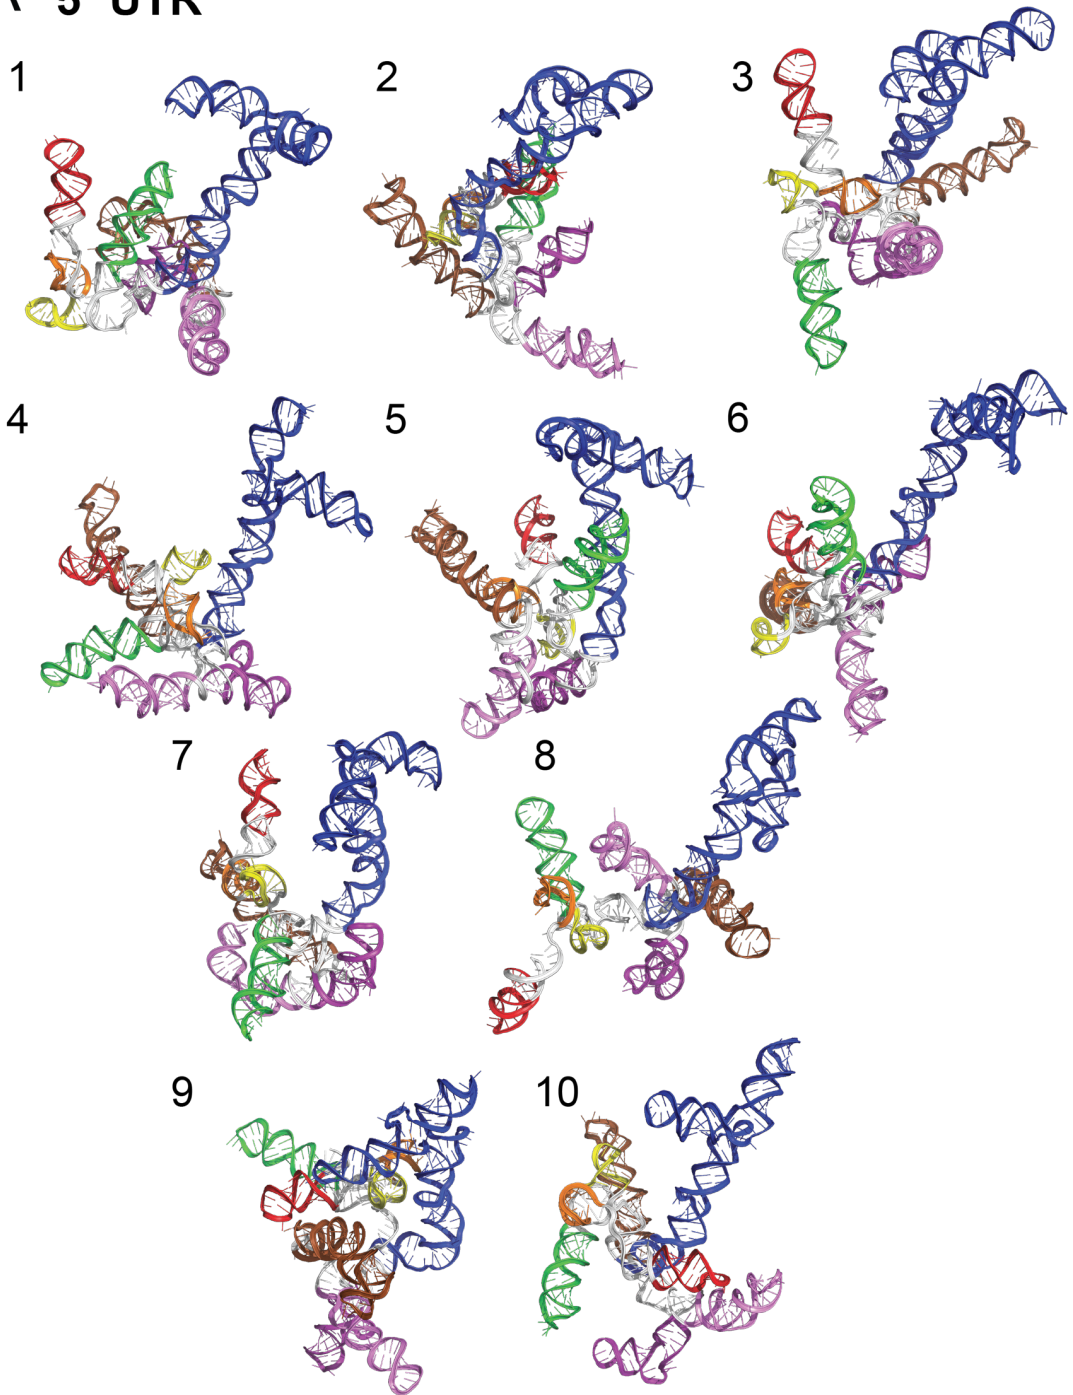

## B SL4ext

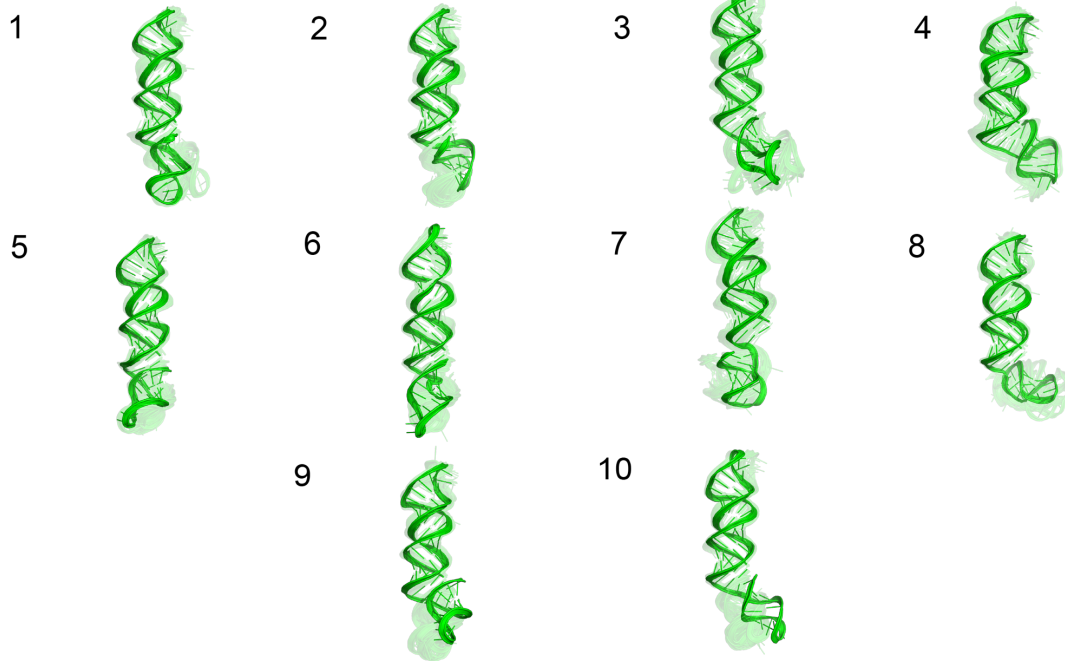

## C SL5-6

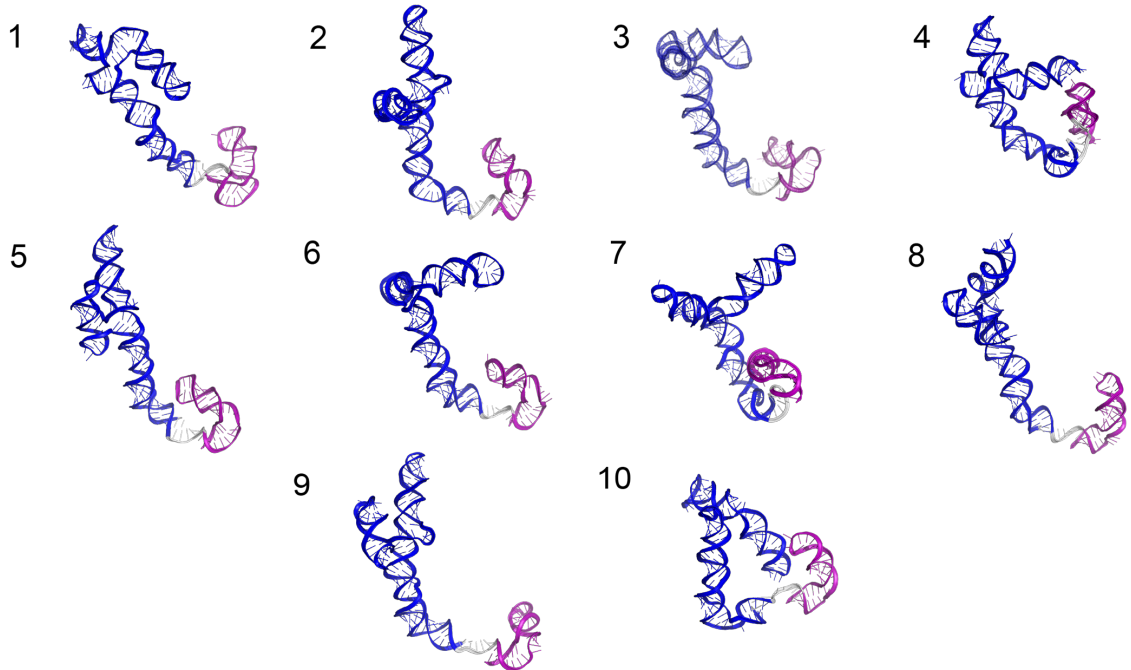

**Supplementary Figure 2.** *Models for the extended 5' UTR, single occupancy clusters.* A) Top 10 clusters (all single-occupancy) are depicted for the extended 5' UTR, colored analogously to the secondary structure in Fig. 1. B) Top 10 clusters for SL4 in the 5' UTR along with a helix at the 3' end predicted from some chemical mapping studies. C) Top 10 clusters for the SL5-6 in the 5' UTR.

A

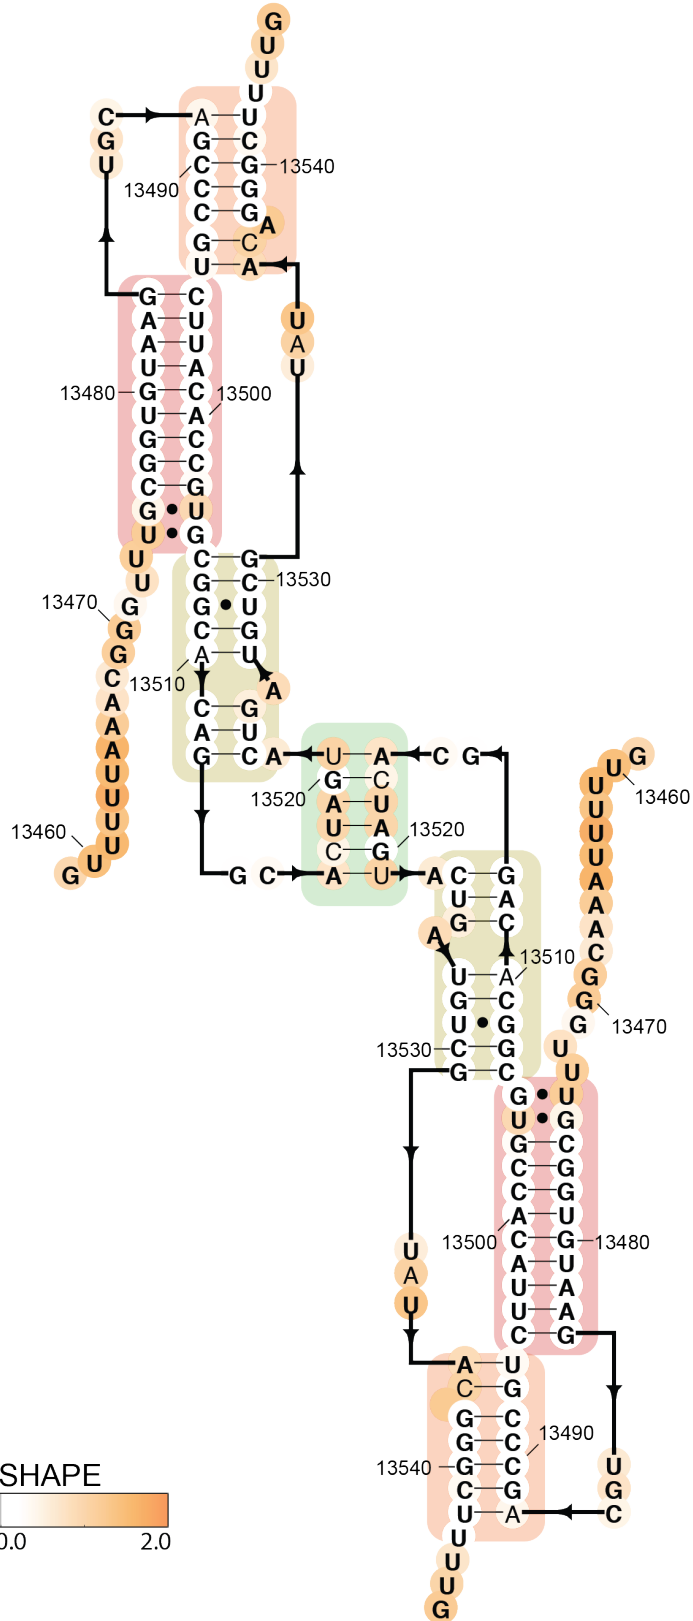

## B Frameshift stimulating element dimer

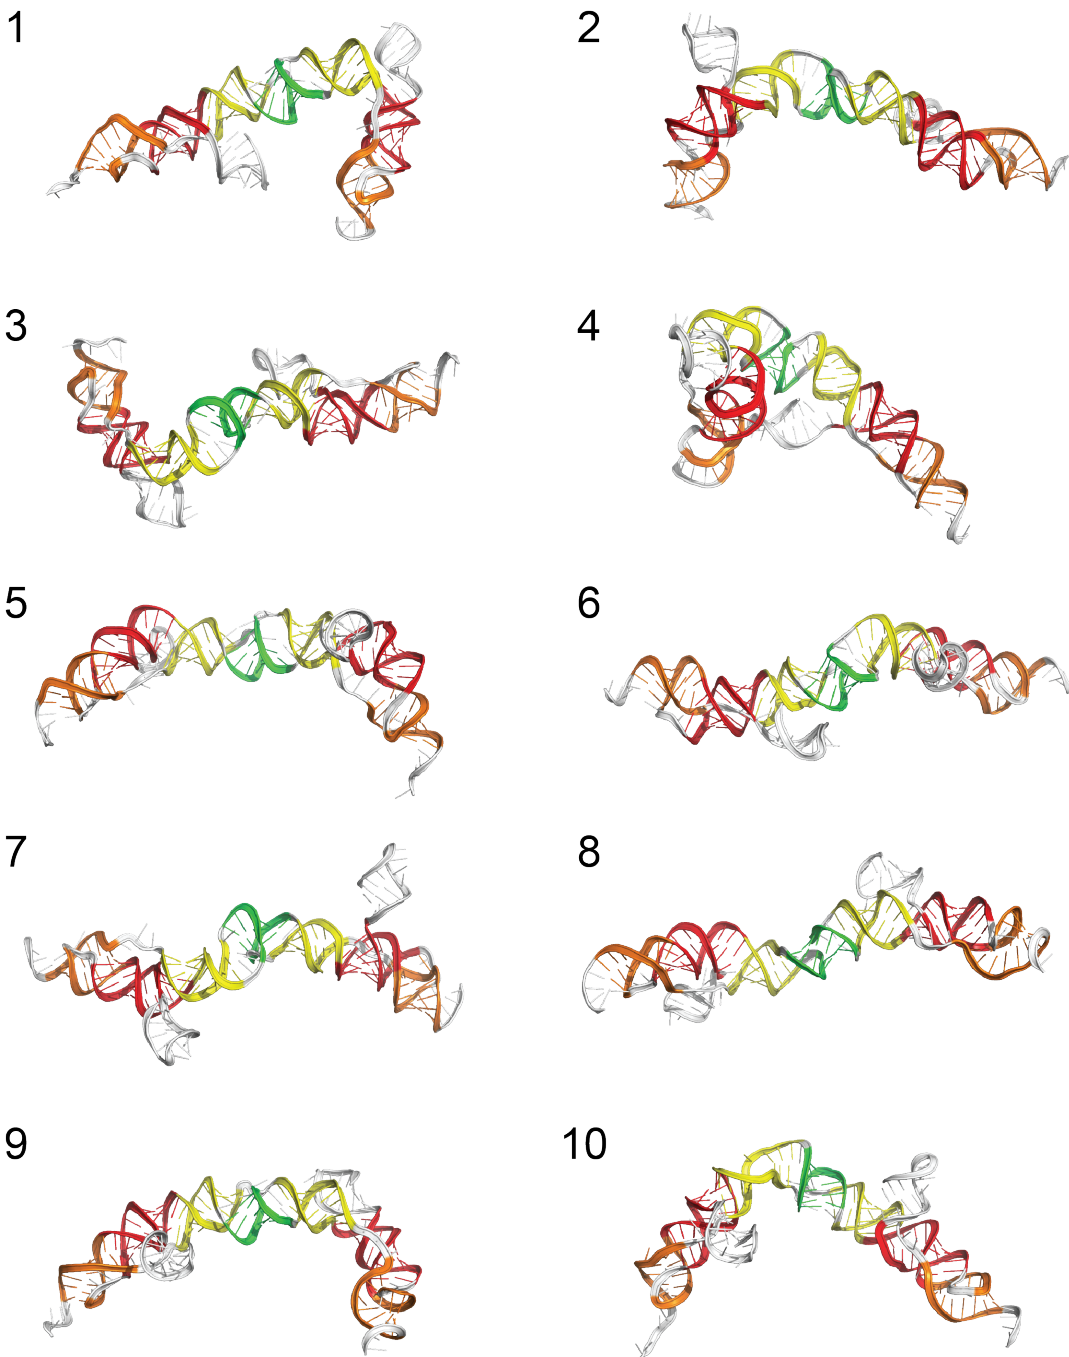

**Supplementary Figure 3.** Models for the putative frameshift stimulation element dimer. A) Secondary structure for the FSE dimer, generated from the secondary structure of the FSE in Fig. 3. B) Top 10 clusters (all single-occupancy) are depicted for the frameshift stimulating element dimer, colored analogously to the secondary structure in Fig. 3.

A

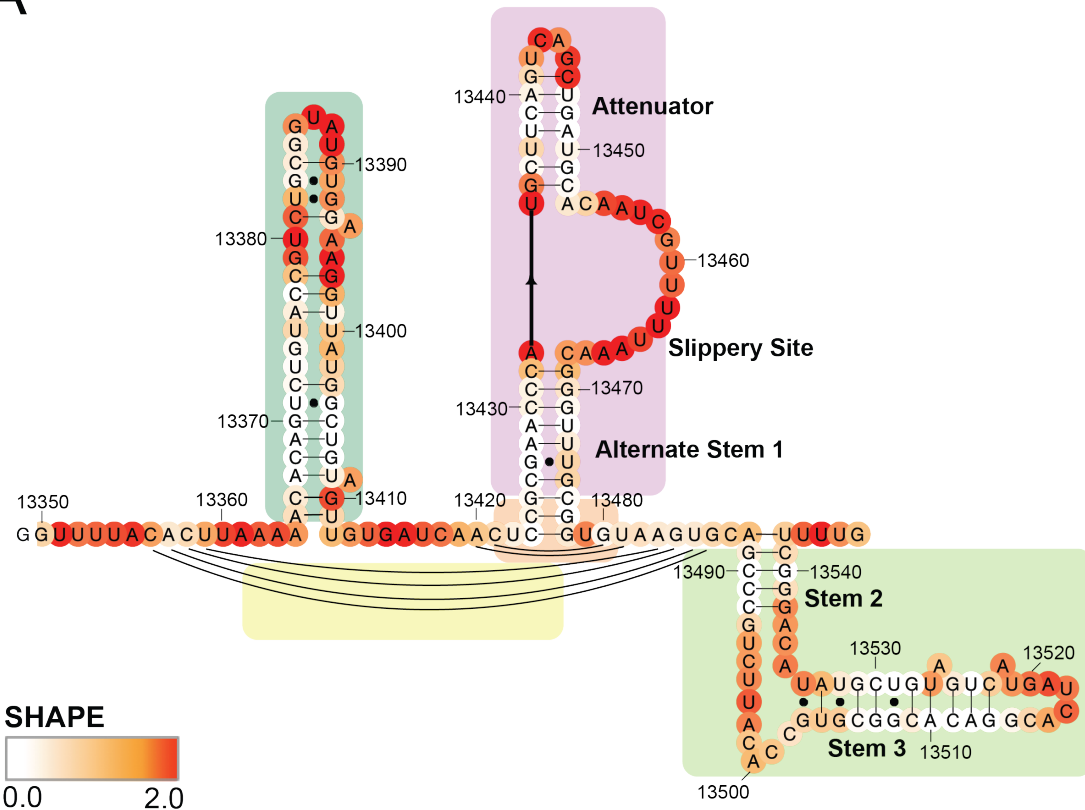



## Extended frameshift stimulating element

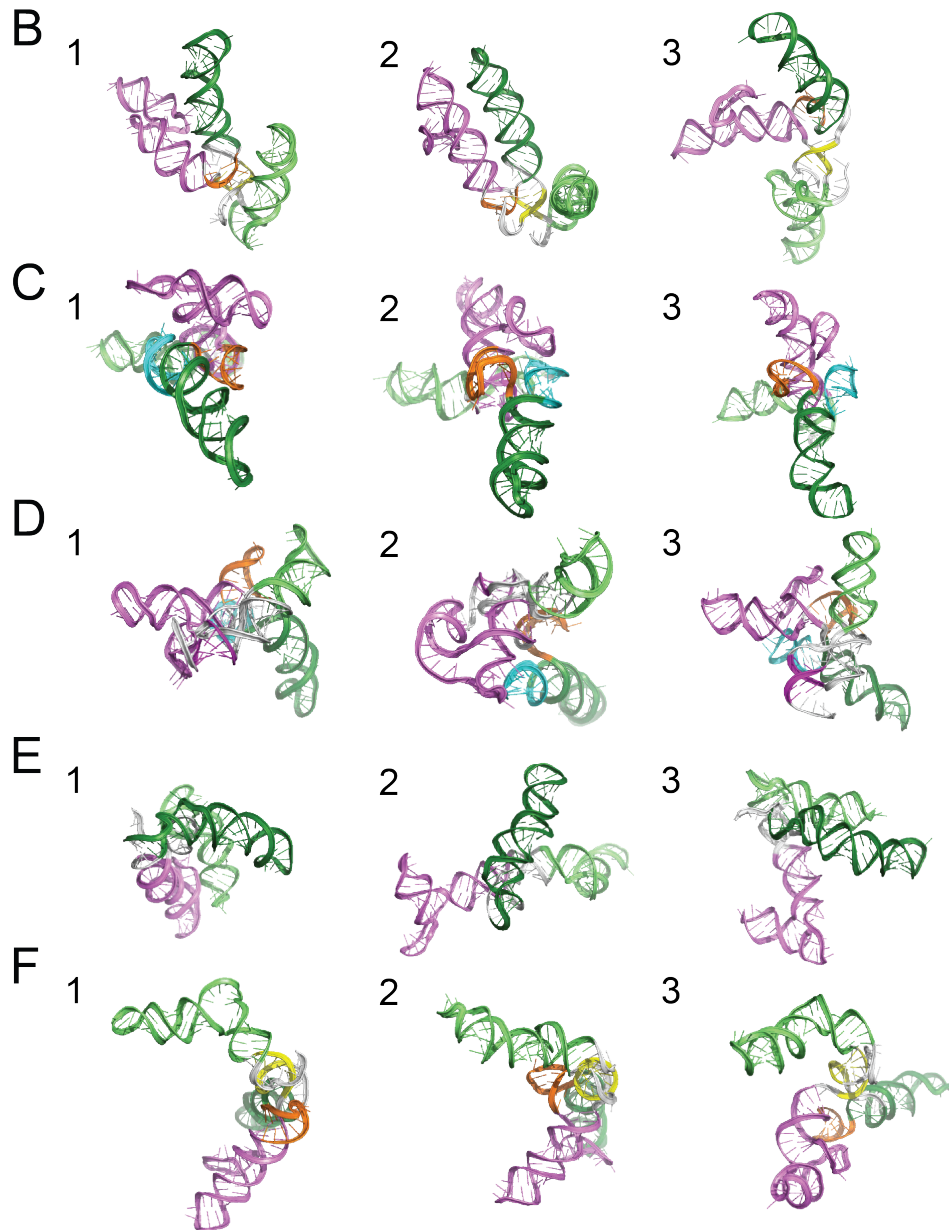

**Supplementary Figure 4.** Models for the extended frameshift stimulation element with different secondary structures. A) Secondary structure for the extended FSE as predicted from RNAstructure guided by the SHAPE data collected Zhang, et al.<sup>1</sup> for this extended FSE construct. Top 3 clusters are depicted for an extended segment including the frameshift stimulating element using secondary structures predicted by RNAstructure guided by chemical reactivity data from B) Zhang, et al.<sup>1</sup> C) Manfredonia, et al.<sup>2</sup> D) Huston, et al.<sup>3</sup> E) Lan, et al.<sup>4</sup> and F) Iserman, et al.<sup>5</sup>



# A 3' UTR

1

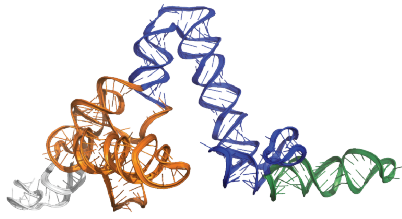

2

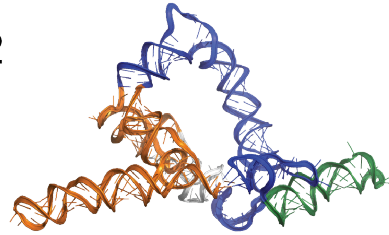

3

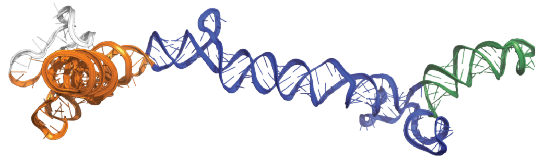

4

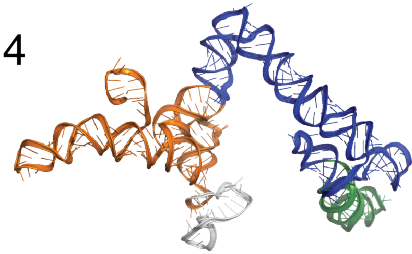

5

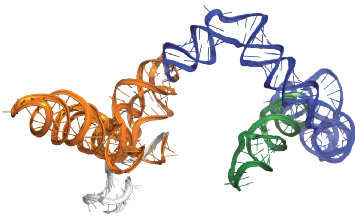

6

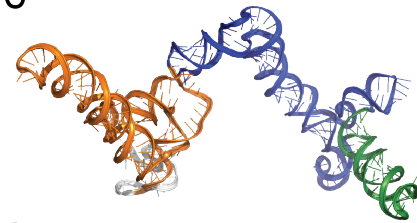

7

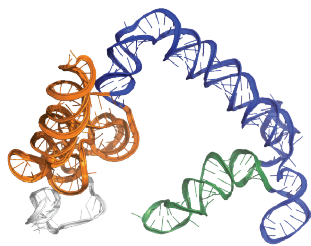

8

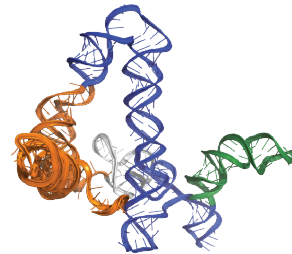

9

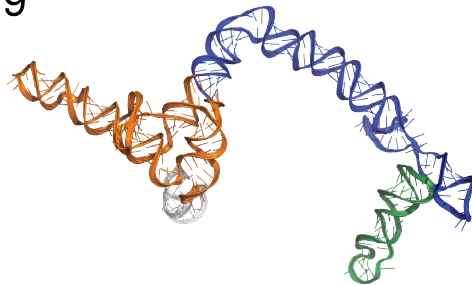

10

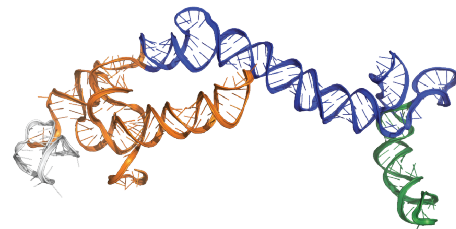

## B Extended 3' UTR Pseudoknot

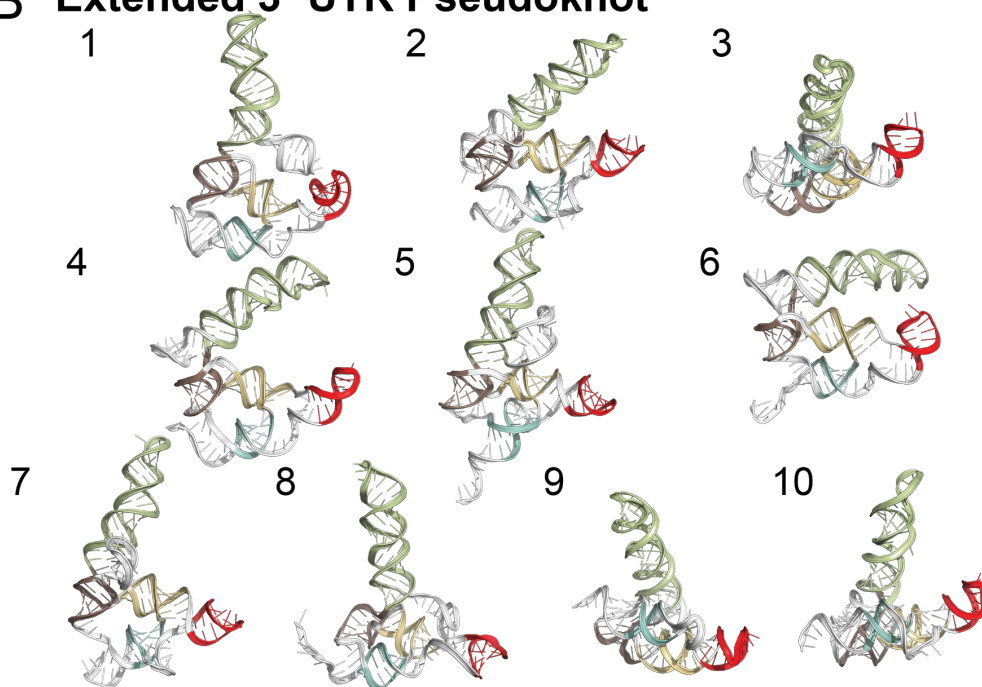

## C 3' UTR Extended BSL

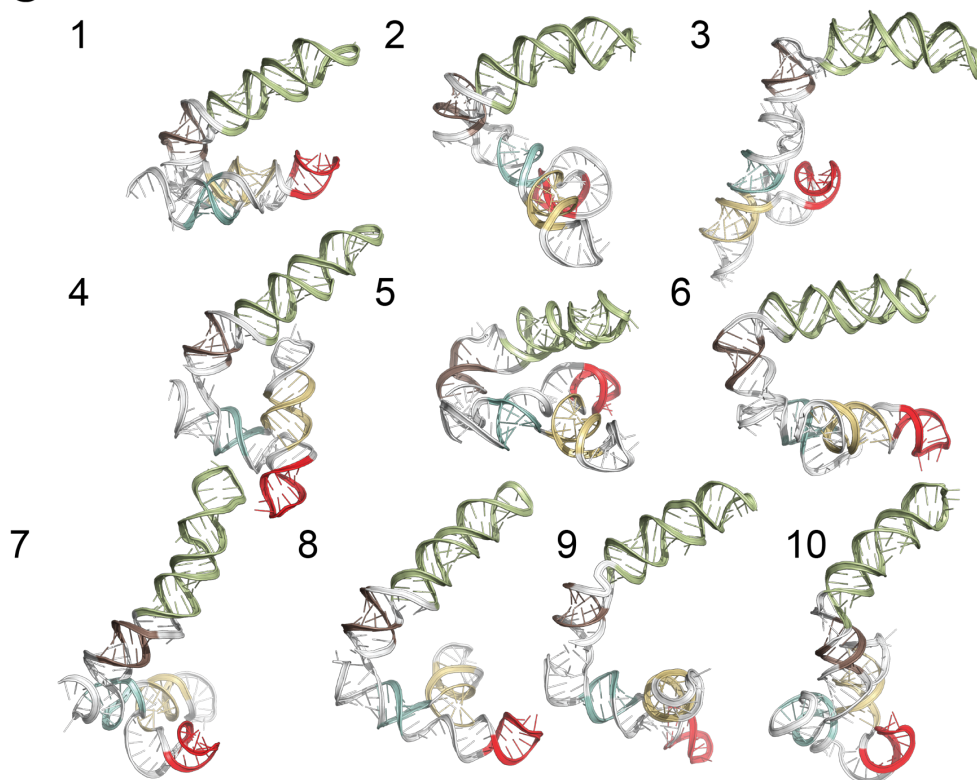

## D Hypervariable region

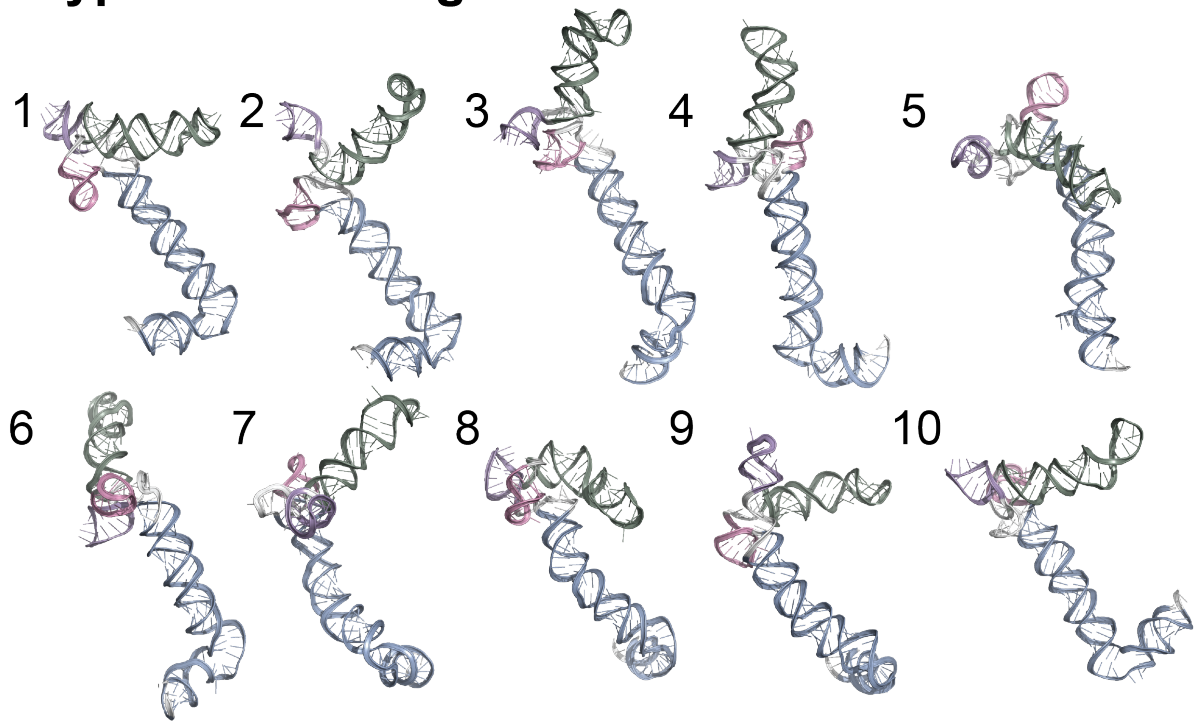

**Supplementary Figure 5.** Models for full 3' UTR and segments of the 3' UTR. Top 10 clusters (all single-occupancy) are depicted for the A) complete 3' UTR, B) 3' UTR pseudoknot, C) 3' UTR extended BSL, and D) hypervariable region. Structures are colored analogously to the 3' UTR secondary structure in Fig. 4.

## 3' UTR Extended BSL

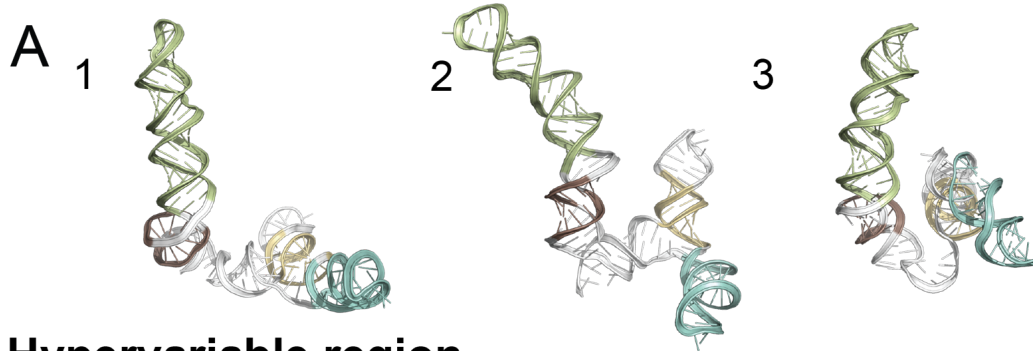

## Hypervariable region

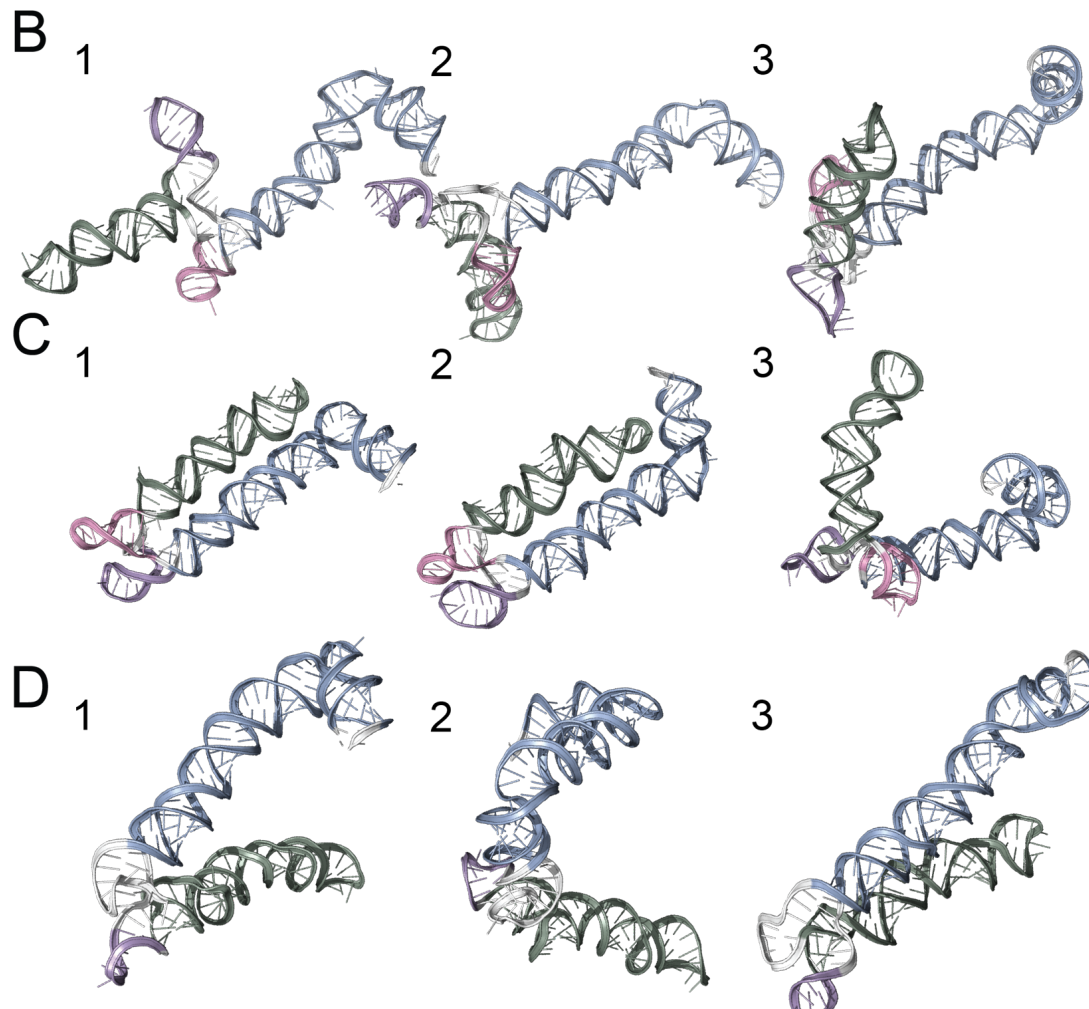

**Supplementary Figure 6.** Models for segments of the 3' UTR with alternate secondary structures. A) Top 3 clusters are depicted for the 3' UTR pseudoknot / extended BSL region with secondary structure as predicted from RNAstructure guided by chemical reactivity data from Huston, et al.<sup>3</sup> Top 3 clusters are depicted for the hypervariable region with structures predicted from RNAstructure guided by chemical reactivity data from B) this study (see Methods), C) Manfredonia, et al.<sup>2</sup>, and D) Huston, et al.<sup>3</sup> Coloring of stems matches Fig. 4.

## HOMOLOGY

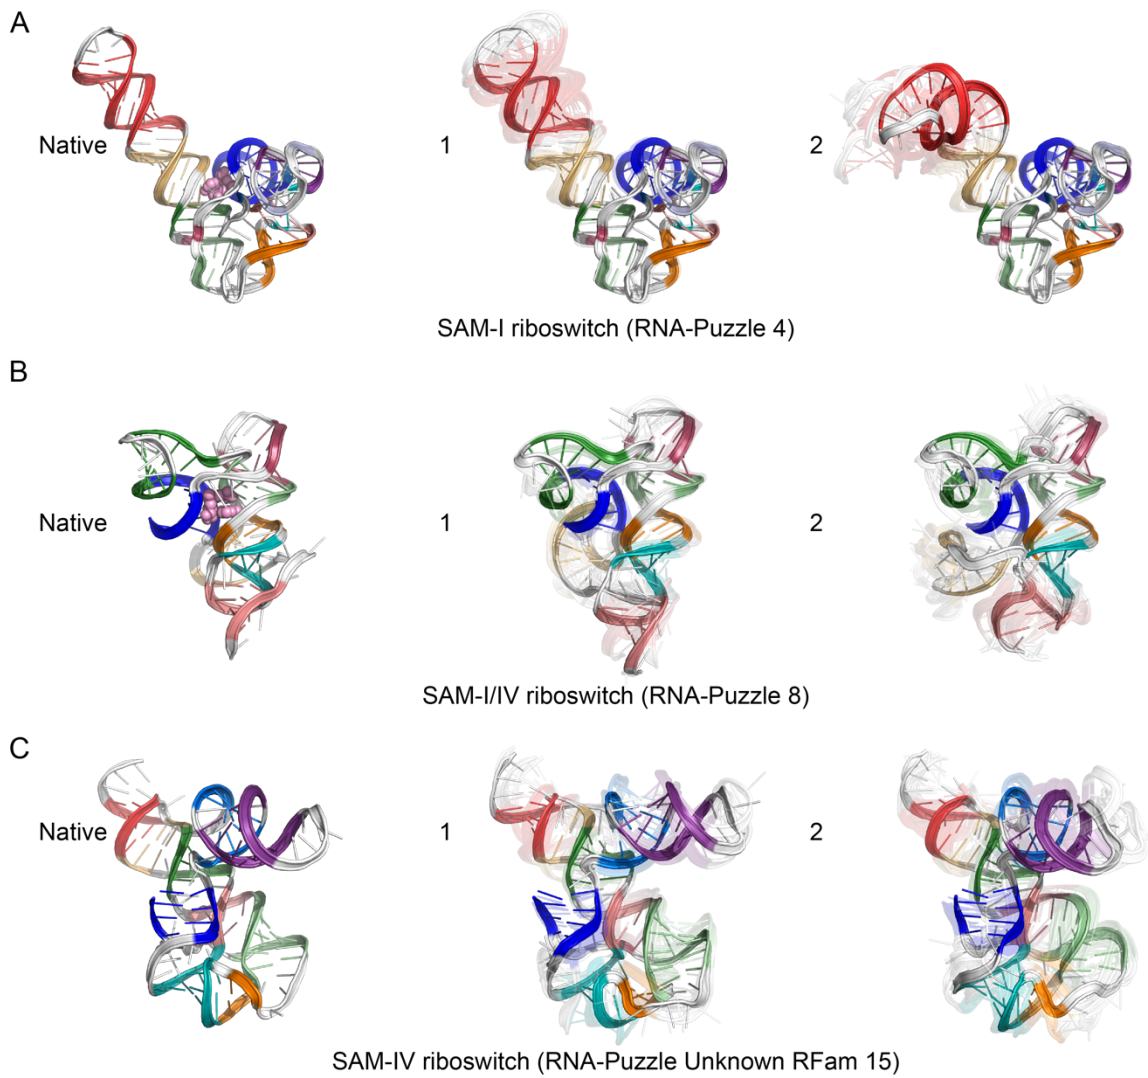



## DE NOVO

D

Native

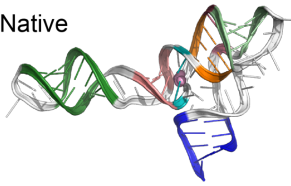

1

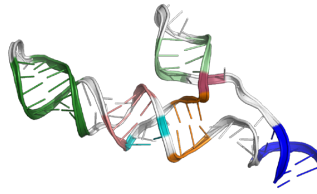

2

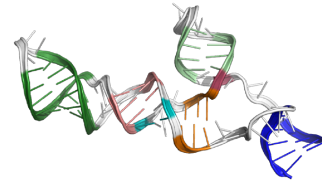

Glycine riboswitch (RNA-Puzzle 3)

E

Native

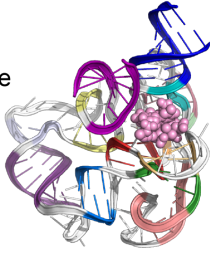

1

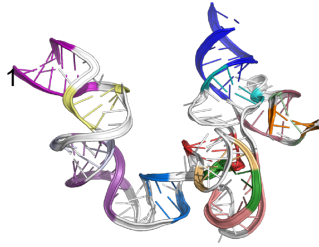

2

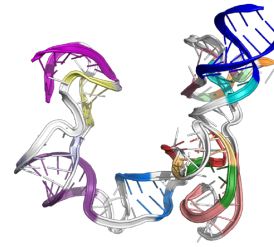

Cobalamin riboswitch (RNA-Puzzle 6)

F

Native

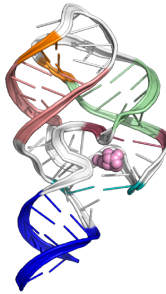

1

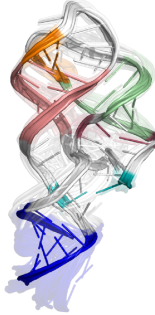

2

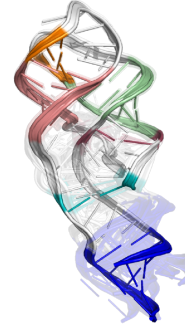

5HT aptamer (RNA-Puzzle 9)

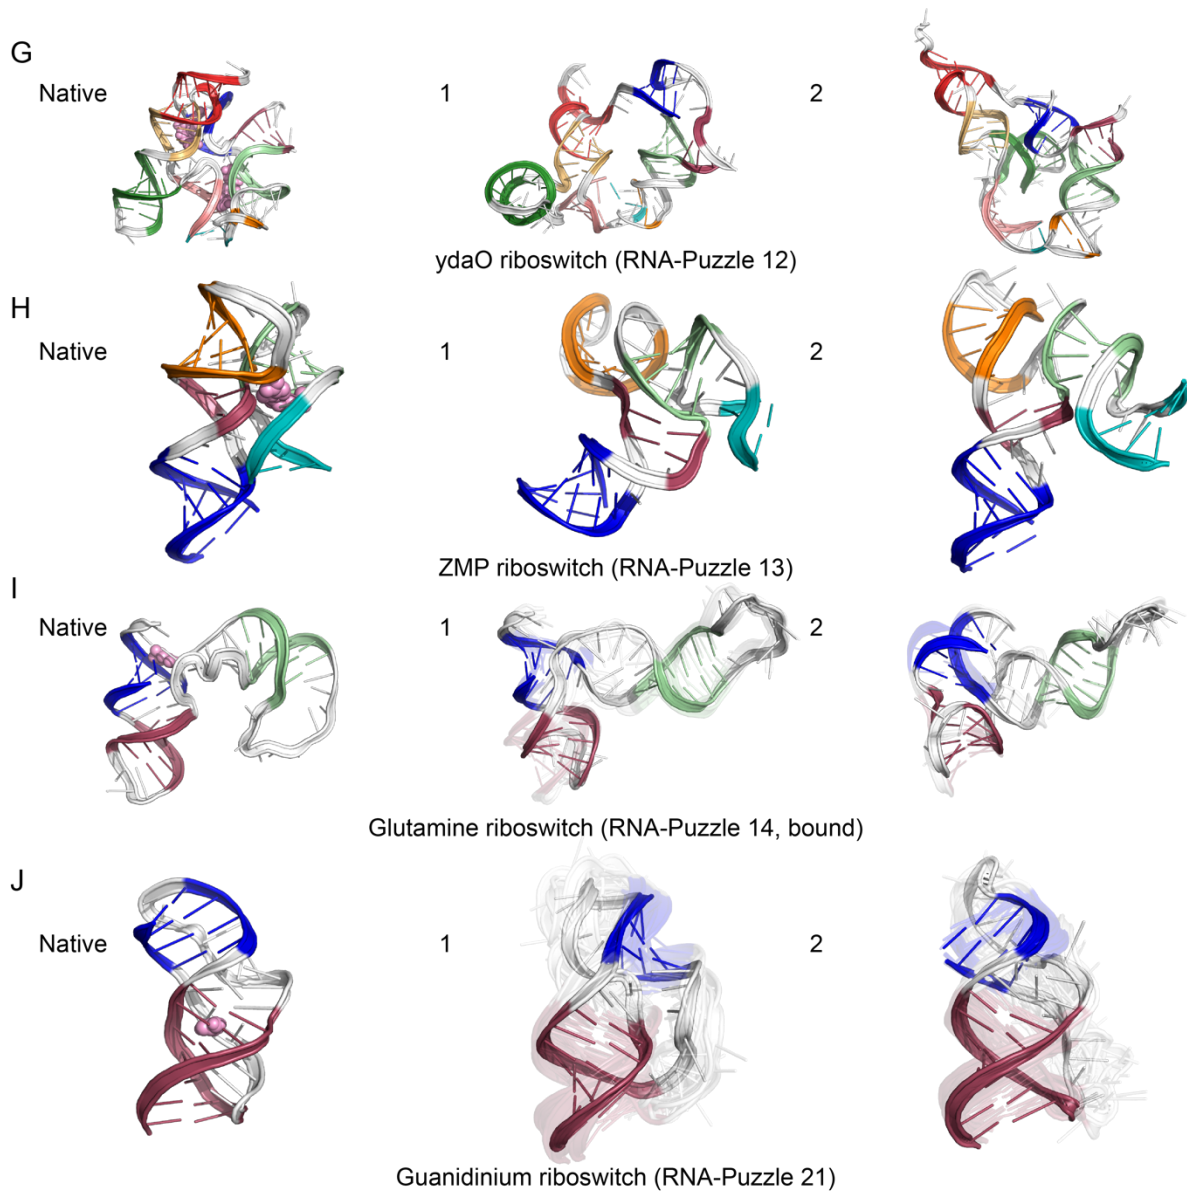

**Supplementary Figure 7.** Top two clusters for the following small-molecule binding RNA riboswitches and aptamers, along with their native structure (left in each panel, with ligand in pink spheres), beginning with three template-guided modeling challenges: A) SAM-I riboswitch, B) SAM-I/IV riboswitch, C) SAM-IV riboswitch, D) glycine riboswitch, E) cobalamin riboswitch, F) 5HT riboswitch, G) cyclic diGMP ydaO riboswitch, H) ZMP riboswitch, I) glutamine riboswitch, J) guanidinium riboswitch. The top-scoring cluster member in each case is depicted with solid colors, and the top cluster members (up to 10) are depicted as transparent structures.

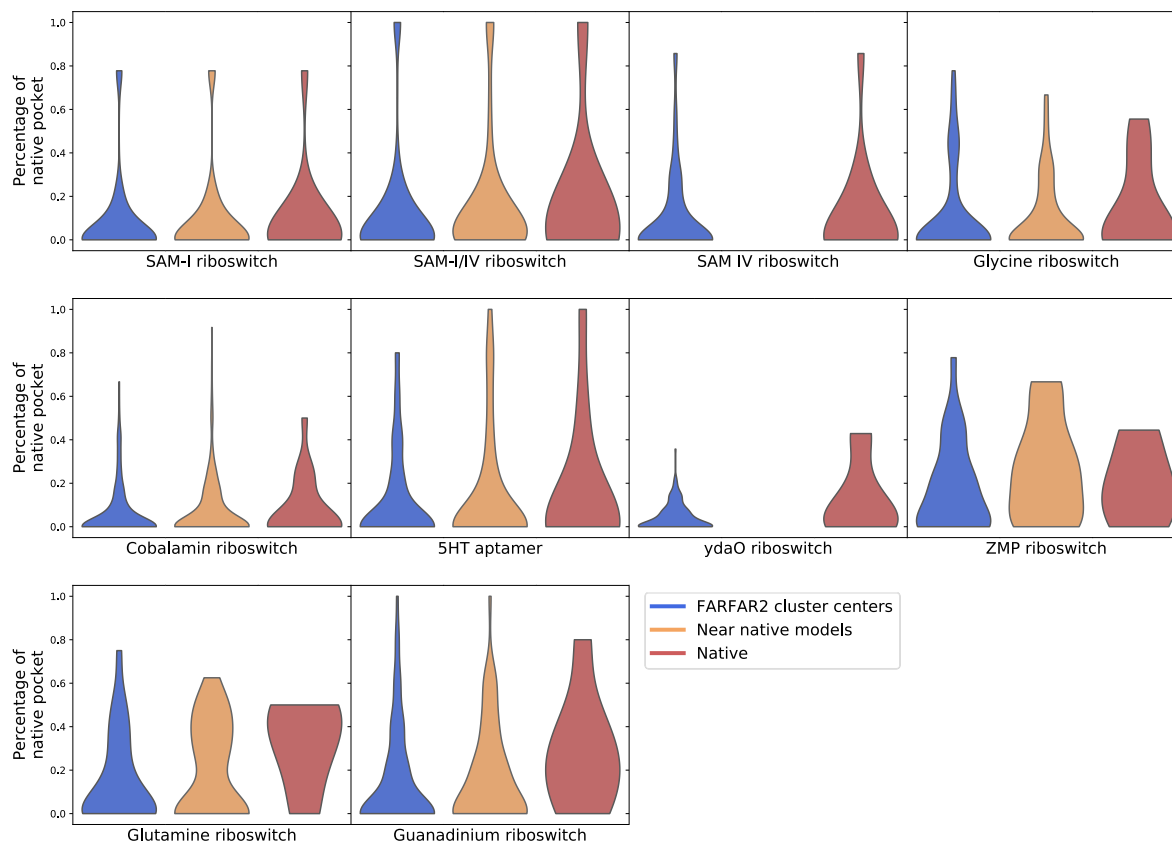

**Supplementary Figure 8.** Percent of native pocket residues included in pocket predictions for ten small-molecule binding RNA riboswitches and aptamers. For each of these 10 cases, pockets were predicted with fpocket for the native structure with the ligand removed, for models constrained to be near-native, and for FARFAR2 cluster centers. These violin plots indicate the percentage of native pocket residues recovered by predicted pockets, showing the distribution across all predicted pockets for each case.







|       |             |                                           |      |     |                                                                                                                                                                                                                                                                                                                                                                        |
|-------|-------------|-------------------------------------------|------|-----|------------------------------------------------------------------------------------------------------------------------------------------------------------------------------------------------------------------------------------------------------------------------------------------------------------------------------------------------------------------------|
| HVR   | 29659–29852 | Sun et al. <sup>7</sup> , <i>in vivo</i>  | Fold | No  | ..((((..(((((((((((..(((..(((.....((((((((((..(((.....))))).((((((((((<br>(...(((..(((.....))))).)))...))))).)))...))....(((.....))..))))))<br>))....))))..))....))))....))))....))))....))))....))))....))))....))))..                                                                                                                                                |
| HVR   | 29659–29852 | Sun et al. <sup>7</sup> , <i>in vitro</i> | Fold | No  | ..((((..(((((((((((..(((..(((.....((((((((((..(((.....))))).((((((((((<br>(...(((..(((.....))))).)))...))))).)))...))....(((.....))..))))))<br>))....))))..))....))))....))))....))))....))))....))))....))))....))))..                                                                                                                                                |
| 3'UTR | 29543–29903 | Literature <sup>6</sup>                   | --   | Yes | .....(((((((((((((((..(((..(((.....((((((((((..(((.....))))).((((((((((<br>...{{{[[][[[]]]}}))....))))))....((((..((((((((((..(((.....))<br>((((((((((..(((.....))))....((((((((((..(((.....))..))....))))....))<br>))....))))....))))....))))....))))....))))....))))....))))....))))....<br>))))....))))....))))....))))....))))....))))....))))....))))....)))).... |
| s2m   | 29724-29773 | Wacker, et al. <sup>9</sup>               | --   | Yes | (((.....(((.....)))))                                                                                                                                                                                                                                                                                                                                                  |
| s2m   | 29724-29773 | Manfredonia, et al. <sup>2</sup>          | Fold | Yes | (((.....(((.....)))))                                                                                                                                                                                                                                                                                                                                                  |
| s2m   | 29724-29773 | This study                                | Fold | Yes | (((.....(((.....)))))                                                                                                                                                                                                                                                                                                                                                  |
| s2m   | 29724-29773 | Huston, et al. <sup>3</sup>               | Fold | Yes | (((.....(((.....)))))                                                                                                                                                                                                                                                                                                                                                  |

<sup>a</sup>Chemical probing dataset used to model secondary structure. `Literature` indicates that structure was obtained from consensus structures reported in prior research.

<sup>b</sup>RNAstructure predictions guided by chemical reactivity data were run with Fold (no pseudoknots allowed) or ShapeKnots (pseudoknots predicted).

**Table S2.** FARFAR2-SARS-CoV-2 models, extended data.

| System/cluster                    | Length | Models generated | Model convergence (Å) <sup>a</sup> | Predicted Minimum RMSD (Å) <sup>b</sup> | E-gap to lowest energy model (REU) <sup>c</sup> | Cluster occupancy <sup>d</sup> | Number of pockets predicted <sup>e</sup> |
|-----------------------------------|--------|------------------|------------------------------------|-----------------------------------------|-------------------------------------------------|--------------------------------|------------------------------------------|
| <b>Extended 5' UTR (1–480)</b>    |        |                  |                                    |                                         |                                                 |                                |                                          |
| 5' UTR/1                          | 480    | 66011            | 50.9                               | 44.92 ± 6.13                            | 0                                               | 1                              | 58                                       |
| 5' UTR/2                          |        |                  |                                    |                                         | 5.15                                            | 1                              | 55                                       |
| 5' UTR/3                          |        |                  |                                    |                                         | 12.45                                           | 1                              | 55                                       |
| 5' UTR/4                          |        |                  |                                    |                                         | 12.66                                           | 1                              | 50                                       |
| 5' UTR/5                          |        |                  |                                    |                                         | 12.98                                           | 1                              | 57                                       |
| 5' UTR/6                          |        |                  |                                    |                                         | 13.07                                           | 1                              | 53                                       |
| 5' UTR/7                          |        |                  |                                    |                                         | 13.92                                           | 1                              | 57                                       |
| 5' UTR/8                          |        |                  |                                    |                                         | 14.9                                            | 1                              | 64                                       |
| 5' UTR/9                          |        |                  |                                    |                                         | 15.43                                           | 1                              | 66                                       |
| 5' UTR/10                         |        |                  |                                    |                                         | 21.01                                           | 1                              | 68                                       |
| <b>5' UTR stem-loop 1 (7–33)</b>  |        |                  |                                    |                                         |                                                 |                                |                                          |
| SL1/1                             | 27     | 200000           | 1.83                               | 5.17 ± 0.52                             | 0                                               | 6                              | 1                                        |
| SL1/2                             |        |                  |                                    |                                         | 0.07                                            | 16                             | 0                                        |
| SL1/3                             |        |                  |                                    |                                         | 0.26                                            | 45                             | 0                                        |
| SL1/4                             |        |                  |                                    |                                         | 0.91                                            | 13                             | 1                                        |
| SL1/5                             |        |                  |                                    |                                         | 0.97                                            | 6                              | 2                                        |
| SL1/6                             |        |                  |                                    |                                         | 1.02                                            | 18                             | 1                                        |
| SL1/7                             |        |                  |                                    |                                         | 1.04                                            | 9                              | 0                                        |
| SL1/8                             |        |                  |                                    |                                         | 1.27                                            | 14                             | 0                                        |
| SL1/9                             |        |                  |                                    |                                         | 1.55                                            | 4                              | 3                                        |
| SL1/10                            |        |                  |                                    |                                         | 1.57                                            | 12                             | 2                                        |
| <b>5' UTR stem-loop 2 (45–59)</b> |        |                  |                                    |                                         |                                                 |                                |                                          |
| SL2/1                             | 15     | 200000           | 2.39                               | 5.63 ± 0.74                             | 0                                               | 52                             | 1                                        |
| SL2/2                             |        |                  |                                    |                                         | 0.73                                            | 44                             | 1                                        |
| SL2/3                             |        |                  |                                    |                                         | 0.95                                            | 78                             | 0                                        |

|                                     |    |         |      |                 |      |     |   |
|-------------------------------------|----|---------|------|-----------------|------|-----|---|
| SL2/4                               |    |         |      |                 | 0.98 | 56  | 1 |
| SL2/5                               |    |         |      |                 | 1.08 | 15  | 0 |
| SL2/6                               |    |         |      |                 | 1.13 | 207 | 0 |
| SL2/7                               |    |         |      |                 | 1.15 | 26  | 1 |
| SL2/8                               |    |         |      |                 | 1.38 | 29  | 1 |
| SL2/9                               |    |         |      |                 | 1.4  | 13  | 1 |
| SL2/10                              |    |         |      |                 | 1.48 | 41  | 0 |
| SL2/Homology                        |    |         |      |                 | 20.2 | 27  | 0 |
| <b>5' UTR stem-loop 3 (61–75)</b>   |    |         |      |                 |      |     |   |
| SL3/1                               | 15 | 200000  | 2.58 | $5.78 \pm 0.70$ | 0    | 7   | 1 |
| SL3/2                               |    |         |      |                 | 0.1  | 45  | 1 |
| SL3/3                               |    |         |      |                 | 0.61 | 10  | 1 |
| SL3/4                               |    |         |      |                 | 0.78 | 69  | 0 |
| SL3/5                               |    |         |      |                 | 1.31 | 70  | 1 |
| SL3/6                               |    |         |      |                 | 1.55 | 6   | 1 |
| SL3/7                               |    |         |      |                 | 1.89 | 84  | 0 |
| SL3/8                               |    |         |      |                 | 1.93 | 49  | 1 |
| SL3/9                               |    |         |      |                 | 2.1  | 35  | 0 |
| SL3/10                              |    |         |      |                 | 2.23 | 18  | 1 |
| <b>5' UTR stem-loop 4 (84–127)</b>  |    |         |      |                 |      |     |   |
| SL4/1                               | 44 | 2018457 | 1.82 | $5.16 \pm 0.49$ | 0    | 5   | 2 |
| SL4/2                               |    |         |      |                 | 0.05 | 1   | 0 |
| SL4/3                               |    |         |      |                 | 0.91 | 4   | 5 |
| SL4/4                               |    |         |      |                 | 0.95 | 4   | 2 |
| SL4/5                               |    |         |      |                 | 1.03 | 5   | 4 |
| SL4/6                               |    |         |      |                 | 1.16 | 11  | 2 |
| SL4/7                               |    |         |      |                 | 1.43 | 6   | 1 |
| SL4/8                               |    |         |      |                 | 1.74 | 2   | 1 |
| SL4/9                               |    |         |      |                 | 1.91 | 3   | 2 |
| SL4/10                              |    |         |      |                 | 1.92 | 1   | 1 |
| <b>5' UTR stem-loop 5 (148–295)</b> |    |         |      |                 |      |     |   |

|                                       |     |         |       |              |      |     |    |
|---------------------------------------|-----|---------|-------|--------------|------|-----|----|
| <b>SL5/1</b>                          | 148 | 2392320 | 18.99 | 19.07 ± 6.15 | 0    | 1   | 12 |
| SL5/2                                 |     |         |       |              | 1.39 | 2   | 22 |
| SL5/3                                 |     |         |       |              | 1.46 | 1   | 18 |
| SL5/4                                 |     |         |       |              | 2.31 | 1   | 21 |
| SL5/5                                 |     |         |       |              | 2.32 | 1   | 14 |
| SL5/6                                 |     |         |       |              | 3.1  | 1   | 13 |
| SL5/7                                 |     |         |       |              | 3.35 | 1   | 18 |
| SL5/8                                 |     |         |       |              | 3.87 | 1   | 18 |
| SL5/9                                 |     |         |       |              | 4.16 | 1   | 12 |
| SL5/10                                |     |         |       |              | 4.23 | 1   | 20 |
| <b>5' UTR stem-loop 5/6 (148–343)</b> |     |         |       |              |      |     |    |
| <b>SL56/1</b>                         | 196 | 2020963 | 25.91 | 24.68 ± 6.27 | 0    | 1   | 19 |
| SL56/2                                |     |         |       |              | 4.42 | 1   | 20 |
| SL56/3                                |     |         |       |              | 4.89 | 2   | 21 |
| SL56/4                                |     |         |       |              | 5.69 | 1   | 24 |
| SL56/5                                |     |         |       |              | 6.75 | 1   | 25 |
| SL56/6                                |     |         |       |              | 8.16 | 1   | 22 |
| SL56/7                                |     |         |       |              | 8.21 | 1   | 23 |
| SL56/8                                |     |         |       |              | 8.47 | 1   | 21 |
| SL56/9                                |     |         |       |              | 8.52 | 1   | 23 |
| SL56/10                               |     |         |       |              | 8.92 | 1   | 17 |
| <b>5' UTR stem-loop 6 (302–343)</b>   |     |         |       |              |      |     |    |
| <b>SL6/1</b>                          | 42  | 200000  | 8.92  | 10.92 ± 2.21 | 0    | 162 | 4  |
| SL6/2                                 |     |         |       |              | 4.21 | 537 | 2  |
| SL6/3                                 |     |         |       |              | 4.97 | 27  | 5  |
| SL6/4                                 |     |         |       |              | 5.32 | 12  | 4  |
| SL6/5                                 |     |         |       |              | 5.37 | 119 | 3  |
| SL6/6                                 |     |         |       |              | 5.38 | 193 | 3  |
| SL6/7                                 |     |         |       |              | 6.03 | 15  | 5  |
| SL6/8                                 |     |         |       |              | 6.42 | 47  | 5  |

|                                                          |     |         |       |              |       |      |    |
|----------------------------------------------------------|-----|---------|-------|--------------|-------|------|----|
| SL6/9                                                    |     |         |       |              | 6.64  | 26   | 3  |
| SL6/10                                                   |     |         |       |              | 6.86  | 148  | 6  |
| <b>5' UTR stem-loop 7 (349–394)</b>                      |     |         |       |              |       |      |    |
| <b>SL7/1</b>                                             | 27  | 200000  | 7.39  | 9.67 ± 1.90  | 0     | 256  | 2  |
| SL7/2                                                    |     |         |       |              | 1.35  | 292  | 2  |
| SL7/3                                                    |     |         |       |              | 12.24 | 726  | 2  |
| SL7/4                                                    |     |         |       |              | 14.6  | 15   | 3  |
| SL7/5                                                    |     |         |       |              | 17.5  | 46   | 7  |
| SL7/6                                                    |     |         |       |              | 20.22 | 2449 | 5  |
| SL7/7                                                    |     |         |       |              | 23.11 | 9    | 5  |
| SL7/8                                                    |     |         |       |              | 23.61 | 20   | 4  |
| SL7/9                                                    |     |         |       |              | 23.88 | 43   | 3  |
| SL7/10                                                   |     |         |       |              | 25.41 | 331  | 2  |
| <b>5' UTR stem-loop 8 (407-478)</b>                      |     |         |       |              |       |      |    |
| <b>SL8/1</b>                                             | 72  | 4055322 | 6.86  | 9.24 ± 1.47  | 0     | 3    | 7  |
| SL8/2                                                    |     |         |       |              | 2.51  | 7    | 4  |
| SL8/3                                                    |     |         |       |              | 3.11  | 18   | 8  |
| SL8/4                                                    |     |         |       |              | 6.27  | 15   | 7  |
| SL8/5                                                    |     |         |       |              | 6.96  | 47   | 6  |
| SL8/6                                                    |     |         |       |              | 7.55  | 27   | 9  |
| SL8/7                                                    |     |         |       |              | 7.7   | 21   | 4  |
| SL8/8                                                    |     |         |       |              | 8.06  | 26   | 5  |
| SL8/9                                                    |     |         |       |              | 8.69  | 17   | 4  |
| SL8/10                                                   |     |         |       |              | 10.55 | 32   | 2  |
| <b>5' UTR reverse complement stem-loops1-4 (149 - 1)</b> |     |         |       |              |       |      |    |
| <b>RC-SL1-4/1</b>                                        | 149 | 2031710 | 19.61 | 19.57 ± 4.37 | 0     | 1    | 14 |
| RC-SL1-4/2                                               |     |         |       |              | 1.5   | 1    | 14 |
| RC-SL1-4/3                                               |     |         |       |              | 3.83  | 1    | 11 |
| RC-SL1-4/4                                               |     |         |       |              | 4.41  | 1    | 8  |
| RC-SL1-4/5                                               |     |         |       |              | 4.5   | 1    | 13 |

|                                                                         |     |        |       |              |       |    |    |
|-------------------------------------------------------------------------|-----|--------|-------|--------------|-------|----|----|
| RC-SL1-4/6                                                              |     |        |       |              | 4.78  | 1  | 11 |
| RC-SL1-4/7                                                              |     |        |       |              | 4.8   | 1  | 16 |
| RC-SL1-4/8                                                              |     |        |       |              | 6.01  | 1  | 8  |
| RC-SL1-4/9                                                              |     |        |       |              | 7.78  | 1  | 7  |
| RC-SL1-4/10                                                             |     |        |       |              | 9.21  | 1  | 22 |
| <b>Frameshift stimulating element (13459–13546)</b>                     |     |        |       |              |       |    |    |
| <b>FSE/1</b>                                                            | 88  | 390722 | 14.45 | 15.39 ± 3.09 | 0     | 5  | 8  |
| FSE/2                                                                   |     |        |       |              | 3.23  | 1  | 9  |
| FSE/3                                                                   |     |        |       |              | 4.44  | 2  | 9  |
| FSE/4                                                                   |     |        |       |              | 5.44  | 3  | 11 |
| FSE/5                                                                   |     |        |       |              | 6.22  | 2  | 12 |
| FSE/6                                                                   |     |        |       |              | 7.47  | 2  | 10 |
| FSE/7                                                                   |     |        |       |              | 7.78  | 1  | 11 |
| FSE/8                                                                   |     |        |       |              | 7.81  | 4  | 7  |
| FSE/9                                                                   |     |        |       |              | 8.06  | 11 | 11 |
| FSE/10                                                                  |     |        |       |              | 8.17  | 8  | 14 |
| <b>Suspected frameshift stimulating element dimer (13459–13546 x 2)</b> |     |        |       |              |       |    |    |
| <b>FSE Dimer/1</b>                                                      | 176 | 23066  | 21.99 | 21.50 ± 4.08 | 0     | 1  | 23 |
| FSE Dimer/2                                                             |     |        |       |              | 6.37  | 1  | 25 |
| FSE Dimer/3                                                             |     |        |       |              | 6.79  | 1  | 25 |
| FSE Dimer/4                                                             |     |        |       |              | 10.02 | 1  | 22 |
| FSE Dimer/5                                                             |     |        |       |              | 10.11 | 1  | 22 |
| FSE Dimer/6                                                             |     |        |       |              | 10.22 | 1  | 23 |
| FSE Dimer/7                                                             |     |        |       |              | 10.31 | 1  | 29 |
| FSE Dimer/8                                                             |     |        |       |              | 11.55 | 1  | 29 |
| FSE Dimer/9                                                             |     |        |       |              | 12.06 | 1  | 28 |
| FSE Dimer/10                                                            |     |        |       |              | 12.45 | 1  | 26 |
| <b>3' UTR beginning with bulged hairpin (29511-29871)</b>               |     |        |       |              |       |    |    |
| <b>3' UTR/1</b>                                                         | 361 | 11430  | 39.71 | 35.85 ± 5.51 | 0     | 1  | 50 |
| 3' UTR/2                                                                |     |        |       |              | 4.07  | 1  | 62 |



|           |  |  |  |  |       |   |    |
|-----------|--|--|--|--|-------|---|----|
| 3' UTR/3  |  |  |  |  | 26.33 | 1 | 47 |
| 3' UTR/4  |  |  |  |  | 32.67 | 1 | 54 |
| 3' UTR/5  |  |  |  |  | 42.1  | 1 | 55 |
| 3' UTR/6  |  |  |  |  | 43.14 | 1 | 59 |
| 3' UTR/7  |  |  |  |  | 46.96 | 1 | 46 |
| 3' UTR/8  |  |  |  |  | 47.55 | 1 | 54 |
| 3' UTR/9  |  |  |  |  | 48.04 | 1 | 49 |
| 3' UTR/10 |  |  |  |  | 48.28 | 1 | 43 |

**3' UTR hypervariable region (29659-29852)**

|              |     |       |       |              |       |   |    |
|--------------|-----|-------|-------|--------------|-------|---|----|
| <b>HVR/1</b> | 194 | 28029 | 25.38 | 24.25 ± 4.18 | 0     | 1 | 30 |
| HVR/2        |     |       |       |              | 2.49  | 1 | 16 |
| HVR/3        |     |       |       |              | 3.6   | 1 | 24 |
| HVR/4        |     |       |       |              | 4.16  | 1 | 28 |
| HVR/5        |     |       |       |              | 5.81  | 1 | 18 |
| HVR/6        |     |       |       |              | 6.79  | 1 | 26 |
| HVR/7        |     |       |       |              | 7.63  | 1 | 23 |
| HVR/8        |     |       |       |              | 7.77  | 1 | 26 |
| HVR/9        |     |       |       |              | 9.06  | 1 | 25 |
| HVR/10       |     |       |       |              | 11.08 | 1 | 25 |

**3' UTR pseudoknot (29543-29665; 29846-29876)**

|                     |     |         |       |              |      |   |    |
|---------------------|-----|---------|-------|--------------|------|---|----|
| <b>Pseudoknot/1</b> | 158 | 1017205 | 21.93 | 21.45 ± 5.52 | 0    | 1 |    |
| Pseudoknot/2        |     |         |       |              | 1.42 | 1 | 17 |
| Pseudoknot/3        |     |         |       |              | 2.87 | 1 | 28 |
| Pseudoknot/4        |     |         |       |              | 3.94 | 1 | 16 |
| Pseudoknot/5        |     |         |       |              | 3.95 | 1 | 18 |
| Pseudoknot/6        |     |         |       |              | 4.06 | 1 | 25 |
| Pseudoknot/7        |     |         |       |              | 4.27 | 1 | 18 |
| Pseudoknot/8        |     |         |       |              | 4.97 | 1 | 20 |
| Pseudoknot/9        |     |         |       |              | 5.37 | 1 | 25 |
| Pseudoknot/10       |     |         |       |              | 6.15 | 1 | 19 |

**3' UTR pseudoknot fragment consisting of the pseudoknot (PK), P2, and P5 (29606-29665; 29842-29876)**

|                                                                                                                      |     |         |       |              |       |        |    |
|----------------------------------------------------------------------------------------------------------------------|-----|---------|-------|--------------|-------|--------|----|
| <b>PK-P2-P5/1</b>                                                                                                    | 95  | 1017205 | 10.24 | 11.99 ± 2.05 | 0     | 1      | 9  |
| PK-P2-P5/2                                                                                                           |     |         |       |              | 0.64  | 2      | 15 |
| PK-P2-P5/3                                                                                                           |     |         |       |              | 0.64  | 1      | 14 |
| PK-P2-P5/4                                                                                                           |     |         |       |              | 0.69  | 2      | 12 |
| PK-P2-P5/5                                                                                                           |     |         |       |              | 0.98  | 3      | 11 |
| PK-P2-P5/6                                                                                                           |     |         |       |              | 1.02  | 5      | 13 |
| PK-P2-P5/7                                                                                                           |     |         |       |              | 1.51  | 1      | 11 |
| PK-P2-P5/8                                                                                                           |     |         |       |              | 1.53  | 1      | 16 |
| PK-P2-P5/9                                                                                                           |     |         |       |              | 2.43  | 1      | 8  |
| PK-P2-P5/10                                                                                                          |     |         |       |              | 2.82  | 3      | 15 |
| <b>3' UTR BSL extended structure (29543–29665; 29846–29876)</b>                                                      |     |         |       |              |       |        |    |
| <b>BSLext/1</b>                                                                                                      | 158 | 1012716 | 24.04 | 23.16 ± 4.29 | 0     | 1      | 19 |
| BSLext/2                                                                                                             |     |         |       |              | 0.48  | 1      | 14 |
| BSLext/3                                                                                                             |     |         |       |              | 2.45  | 1      | 19 |
| BSLext/4                                                                                                             |     |         |       |              | 6.22  | 1      | 15 |
| BSLext/5                                                                                                             |     |         |       |              | 6.34  | 1      | 13 |
| BSLext/6                                                                                                             |     |         |       |              | 6.38  | 1      | 22 |
| BSLext/7                                                                                                             |     |         |       |              | 6.45  | 1      | 19 |
| BSLext/8                                                                                                             |     |         |       |              | 6.56  | 1      | 16 |
| BSLext/9                                                                                                             |     |         |       |              | 6.76  | 1      | 11 |
| BSLext/10                                                                                                            |     |         |       |              | 6.84  | 1      | 16 |
| <b>3' UTR stem-loop II-like motif, homology modeled from PDB ID: 1XJR<sup>10</sup> (29724–29773)</b>                 |     |         |       |              |       |        |    |
| <b>S2M/1</b>                                                                                                         | 50  | 200000  | 6.95  | 9.32 ± 0.09  | 0     | 199977 | 11 |
| S2M/2                                                                                                                |     |         |       |              | 11.38 | 23     | 6  |
| <b>3' UTR stem-loop II-like motif, secondary structure from NMR data in Wacker, et al.<sup>9</sup> (29724–29773)</b> |     |         |       |              |       |        |    |
| <b>S2M/1</b>                                                                                                         | 50  | 500000  | 2.97  | 6.10 ± 0.75  | 0     | 1      | 2  |
| S2M/2                                                                                                                |     |         |       |              | 0.63  | 2      | 2  |
| S2M/3                                                                                                                |     |         |       |              | 0.63  | 1      | 3  |
| S2M/4                                                                                                                |     |         |       |              | 1.9   | 1      | 6  |
| S2M/5                                                                                                                |     |         |       |              | 2.16  | 1      | 1  |

|        |  |  |  |  |      |   |   |
|--------|--|--|--|--|------|---|---|
| S2M/6  |  |  |  |  | 2.6  | 1 | 3 |
| S2M/7  |  |  |  |  | 3.1  | 1 | 1 |
| S2M/8  |  |  |  |  | 3.45 | 1 | 3 |
| S2M/9  |  |  |  |  | 4.14 | 1 | 1 |
| S2M/10 |  |  |  |  | 4.29 | 1 | 3 |

<sup>a</sup>Mean pairwise all-heavy-atom RMSD between 10 lowest energy cluster centers.

<sup>b</sup>Predicted RMSD to true structure.

<sup>c</sup>Rosetta all-atom free energy gap of cluster's lowest energy model compared to lowest energy model discovered in run. REU = Rosetta energy units, calibrated so that 1.0 corresponds approximately to 1 k<sub>B</sub>T.

<sup>d</sup>Number of models that appear in each cluster. Clustering was carried out on top 400 models ranked by Rosetta all-atom free energy, based on 5.0 Å threshold, except for small RNAs (SL1-4, SL6-7, s2m), where 2.0 Å threshold was applied.

<sup>e</sup>Number of pockets predicted from fpocket for the cluster center decoy, using default settings for fpocket prediction.

**Table S3.** FARFAR2-SARS-CoV-2 models, extended data for alternate secondary structures.

| System/cluster                                                                              | Length | Models generated | Model convergence (Å) <sup>a</sup> | Predicted minimum RMSD (Å) <sup>b</sup> | E-gap to lowest energy model (REU) <sup>c</sup> | Cluster occupancy <sup>d</sup> | Number of pockets predicted <sup>e</sup> |
|---------------------------------------------------------------------------------------------|--------|------------------|------------------------------------|-----------------------------------------|-------------------------------------------------|--------------------------------|------------------------------------------|
| <b>5' UTR stem-loop 4 extended (84–146)</b>                                                 |        |                  |                                    |                                         |                                                 |                                |                                          |
| SL4ext/1                                                                                    | 63     | 143897           | 7.5                                | 9.76 ± 1.97                             | 0                                               | 645                            | 6                                        |
| SL4ext/2                                                                                    |        |                  |                                    |                                         | 5.28                                            | 377                            | 12                                       |
| SL4ext/3                                                                                    |        |                  |                                    |                                         | 5.78                                            | 21                             | 4                                        |
| SL4ext/4                                                                                    |        |                  |                                    |                                         | 8.29                                            | 17                             | 6                                        |
| SL4ext/5                                                                                    |        |                  |                                    |                                         | 8.79                                            | 202                            | 5                                        |
| SL4ext/6                                                                                    |        |                  |                                    |                                         | 9.07                                            | 560                            | 7                                        |
| SL4ext/7                                                                                    |        |                  |                                    |                                         | 11.76                                           | 15                             | 7                                        |
| SL4ext/8                                                                                    |        |                  |                                    |                                         | 11.83                                           | 25                             | 3                                        |
| SL4ext/9                                                                                    |        |                  |                                    |                                         | 12.02                                           | 177                            | 5                                        |
| SL4ext/10                                                                                   |        |                  |                                    |                                         | 12.58                                           | 742                            | 6                                        |
| <b>FSE extended, secondary structure from Zhang, et al.<sup>1</sup> (13349-13546)</b>       |        |                  |                                    |                                         |                                                 |                                |                                          |
| FSEext/1                                                                                    | 198    | 993756           | 28.69                              | 26.93 ± 4.46                            | 0                                               | 1                              | 24                                       |
| FSEext/2                                                                                    |        |                  |                                    |                                         | 1.49                                            | 1                              | 28                                       |
| FSEext/3                                                                                    |        |                  |                                    |                                         | 2.28                                            | 1                              | 43                                       |
| FSEext/4                                                                                    |        |                  |                                    |                                         | 4.83                                            | 1                              | 21                                       |
| FSEext/5                                                                                    |        |                  |                                    |                                         | 5.91                                            | 1                              | 31                                       |
| FSEext/6                                                                                    |        |                  |                                    |                                         | 5.98                                            | 1                              | 26                                       |
| FSEext/7                                                                                    |        |                  |                                    |                                         | 6.69                                            | 1                              | 22                                       |
| FSEext/8                                                                                    |        |                  |                                    |                                         | 7.11                                            | 1                              | 24                                       |
| FSEext/9                                                                                    |        |                  |                                    |                                         | 7.88                                            | 1                              | 33                                       |
| FSEext/10                                                                                   |        |                  |                                    |                                         | 8.05                                            | 1                              | 24                                       |
| <b>FSE extended, secondary structure from Manfredonia, et al.<sup>2</sup> (13349-13546)</b> |        |                  |                                    |                                         |                                                 |                                |                                          |
| FSEext/1                                                                                    | 198    | 1021344          | 24.16                              | 23.26 ± 4.92                            | 0                                               | 1                              | 22                                       |
| FSEext/2                                                                                    |        |                  |                                    |                                         | 3.77                                            | 1                              | 20                                       |
| FSEext/3                                                                                    |        |                  |                                    |                                         | 4.3                                             | 1                              | 23                                       |

|                                                                                         |     |        |       |              |       |   |    |
|-----------------------------------------------------------------------------------------|-----|--------|-------|--------------|-------|---|----|
| FSEext/4                                                                                |     |        |       |              | 4.76  | 2 | 25 |
| FSEext/5                                                                                |     |        |       |              | 4.87  | 1 | 25 |
| FSEext/6                                                                                |     |        |       |              | 5.54  | 1 | 23 |
| FSEext/7                                                                                |     |        |       |              | 5.73  | 1 | 24 |
| FSEext/8                                                                                |     |        |       |              | 6.24  | 1 | 25 |
| FSEext/9                                                                                |     |        |       |              | 6.7   | 1 | 23 |
| FSEext/10                                                                               |     |        |       |              | 7.39  | 1 | 34 |
| <b>FSE extended, secondary structure from Huston, et al.<sup>3</sup> (13349-13546)</b>  |     |        |       |              |       |   |    |
| <b>FSEext/1</b>                                                                         | 198 | 252971 | 20.79 | 20.53 ± 6.00 | 0     | 1 | 25 |
| FSEext/2                                                                                |     |        |       |              | 2.32  | 1 | 20 |
| FSEext/3                                                                                |     |        |       |              | 9     | 1 | 25 |
| FSEext/4                                                                                |     |        |       |              | 11.17 | 1 | 29 |
| FSEext/5                                                                                |     |        |       |              | 11.93 | 1 | 26 |
| FSEext/6                                                                                |     |        |       |              | 12.16 | 1 | 25 |
| FSEext/7                                                                                |     |        |       |              | 12.62 | 1 | 25 |
| FSEext/8                                                                                |     |        |       |              | 13.3  | 1 | 25 |
| FSEext/9                                                                                |     |        |       |              | 14    | 1 | 23 |
| FSEext/10                                                                               |     |        |       |              | 14.06 | 1 | 21 |
| <b>FSE extended, secondary structure from Lan, et al.<sup>2</sup> (13349-13546)</b>     |     |        |       |              |       |   |    |
| <b>FSEext/1</b>                                                                         | 198 | 267963 | 31.76 | 29.42 ± 4.62 | 0     | 1 | 23 |
| FSEext/2                                                                                |     |        |       |              | 5.1   | 1 | 26 |
| FSEext/3                                                                                |     |        |       |              | 5.23  | 1 | 27 |
| FSEext/4                                                                                |     |        |       |              | 8.23  | 1 | 28 |
| FSEext/5                                                                                |     |        |       |              | 8.25  | 1 | 26 |
| FSEext/6                                                                                |     |        |       |              | 9.59  | 1 | 21 |
| FSEext/7                                                                                |     |        |       |              | 10.78 | 1 | 23 |
| FSEext/8                                                                                |     |        |       |              | 11.69 | 1 | 33 |
| FSEext/9                                                                                |     |        |       |              | 12.69 | 1 | 23 |
| FSEext/10                                                                               |     |        |       |              | 13.24 | 1 | 22 |
| <b>FSE extended, secondary structure from Iserman, et al.<sup>5</sup> (13349-13546)</b> |     |        |       |              |       |   |    |

|                                                                                             |     |         |       |              |       |   |    |
|---------------------------------------------------------------------------------------------|-----|---------|-------|--------------|-------|---|----|
| <b>FSEext/1</b>                                                                             | 198 | 1013658 | 28.16 | 26.50 ± 5.21 | 0     | 1 | 22 |
| FSEext/2                                                                                    |     |         |       |              | 0.27  | 1 | 28 |
| FSEext/3                                                                                    |     |         |       |              | 1.78  | 1 | 24 |
| FSEext/4                                                                                    |     |         |       |              | 2.02  | 1 | 29 |
| FSEext/5                                                                                    |     |         |       |              | 2.09  | 1 | 25 |
| FSEext/6                                                                                    |     |         |       |              | 2.94  | 1 | 25 |
| FSEext/7                                                                                    |     |         |       |              | 4.73  | 1 | 25 |
| FSEext/8                                                                                    |     |         |       |              | 5.06  | 1 | 29 |
| FSEext/9                                                                                    |     |         |       |              | 5.52  | 1 | 20 |
| FSEext/10                                                                                   |     |         |       |              | 5.89  | 1 | 25 |
| <b>HVR, secondary structure based on chemical reactivity from this study (29659– 29852)</b> |     |         |       |              |       |   |    |
| <b>HVRalt/1</b>                                                                             | 194 | 1010583 | 28.17 | 26.51 ± 6.39 | 0     | 1 | 25 |
| HVRalt/2                                                                                    |     |         |       |              | 5.15  | 1 | 16 |
| HVRalt/3                                                                                    |     |         |       |              | 6.85  | 1 | 16 |
| HVRalt/4                                                                                    |     |         |       |              | 6.97  | 1 | 13 |
| HVRalt/5                                                                                    |     |         |       |              | 9.3   | 1 | 23 |
| HVRalt/6                                                                                    |     |         |       |              | 10    | 1 | 11 |
| HVRalt/7                                                                                    |     |         |       |              | 10.29 | 1 | 22 |
| HVRalt/8                                                                                    |     |         |       |              | 11.23 | 1 | 23 |
| HVRalt/9                                                                                    |     |         |       |              | 11.4  | 1 | 20 |
| HVRalt/10                                                                                   |     |         |       |              | 11.44 | 1 | 21 |
| <b>HVR, secondary structure from Manfredonia, et al.<sup>2</sup> (29659– 29852)</b>         |     |         |       |              |       |   |    |
| <b>HVRalt/1</b>                                                                             | 194 | 1011993 | 25.11 | 24.03 ± 5.66 | 0     | 1 | 21 |
| HVRalt/2                                                                                    |     |         |       |              | 3.31  | 1 | 20 |
| HVRalt/3                                                                                    |     |         |       |              | 6.86  | 1 | 16 |
| HVRalt/4                                                                                    |     |         |       |              | 8.71  | 1 | 14 |
| HVRalt/5                                                                                    |     |         |       |              | 10.87 | 1 | 18 |
| HVRalt/6                                                                                    |     |         |       |              | 11.33 | 1 | 21 |
| HVRalt/7                                                                                    |     |         |       |              | 12.62 | 1 | 18 |
| HVRalt/8                                                                                    |     |         |       |              | 13.17 | 1 | 18 |
| HVRalt/9                                                                                    |     |         |       |              | 13.51 | 1 | 14 |

|                                                                                                                       |     |         |       |              |       |   |    |
|-----------------------------------------------------------------------------------------------------------------------|-----|---------|-------|--------------|-------|---|----|
| HVRalt/10                                                                                                             |     |         |       |              | 13.85 | 1 | 25 |
| <b>HVR, secondary structure from Huston, et al.<sup>3</sup> (29659– 29852)</b>                                        |     |         |       |              |       |   |    |
| <b>HVRalt/1</b>                                                                                                       | 194 | 1018079 | 25.06 | 23.99 ± 5.39 | 0     | 1 | 22 |
| HVRalt/2                                                                                                              |     |         |       |              | 0.91  | 1 | 25 |
| HVRalt/3                                                                                                              |     |         |       |              | 3.71  | 1 | 15 |
| HVRalt/4                                                                                                              |     |         |       |              | 3.78  | 1 | 20 |
| HVRalt/5                                                                                                              |     |         |       |              | 4.28  | 1 | 21 |
| HVRalt/6                                                                                                              |     |         |       |              | 6.65  | 1 | 17 |
| HVRalt/7                                                                                                              |     |         |       |              | 8.27  | 1 | 28 |
| HVRalt/8                                                                                                              |     |         |       |              | 8.53  | 1 | 15 |
| HVRalt/9                                                                                                              |     |         |       |              | 8.93  | 1 | 19 |
| HVRalt/10                                                                                                             |     |         |       |              | 9.72  | 1 | 24 |
| <b>3' UTR BSL extended structure from Huston, et al.<sup>3</sup> (29543–29665; 29846–29876)</b>                       |     |         |       |              |       |   |    |
| <b>BSLext/1</b>                                                                                                       | 158 | 1007602 | 25.81 | 24.60 ± 4.94 | 0     | 1 | 27 |
| BSLext/2                                                                                                              |     |         |       |              | 1.61  | 1 | 15 |
| BSLext/3                                                                                                              |     |         |       |              | 4.48  | 1 | 24 |
| BSLext/4                                                                                                              |     |         |       |              | 6.48  | 1 | 21 |
| BSLext/5                                                                                                              |     |         |       |              | 7.22  | 1 | 15 |
| BSLext/6                                                                                                              |     |         |       |              | 7.42  | 1 | 17 |
| BSLext/7                                                                                                              |     |         |       |              | 7.84  | 1 | 18 |
| BSLext/8                                                                                                              |     |         |       |              | 8.31  | 1 | 19 |
| BSLext/9                                                                                                              |     |         |       |              | 9.2   | 1 | 17 |
| BSLext/10                                                                                                             |     |         |       |              | 9.29  | 1 | 16 |
| <b>3' UTR stem-loop II-like motif, secondary structure based on chemical reactivity from this study (29724–29773)</b> |     |         |       |              |       |   |    |
| <b>S2M/1</b>                                                                                                          | 50  | 500000  | 2.56  | 5.76 ± 0.57  | 0     | 1 | 25 |
| S2M/2                                                                                                                 |     |         |       |              | 0.29  | 2 | 16 |
| S2M/3                                                                                                                 |     |         |       |              | 1.46  | 1 | 16 |
| S2M/4                                                                                                                 |     |         |       |              | 1.57  | 1 | 13 |
| S2M/5                                                                                                                 |     |         |       |              | 2.89  | 1 | 23 |
| S2M/6                                                                                                                 |     |         |       |              | 3.04  | 2 | 11 |

|                                                                                                                                         |    |        |      |             |      |   |    |
|-----------------------------------------------------------------------------------------------------------------------------------------|----|--------|------|-------------|------|---|----|
| S2M/7                                                                                                                                   |    |        |      |             | 3.11 | 3 | 22 |
| S2M/8                                                                                                                                   |    |        |      |             | 3.88 | 1 | 23 |
| S2M/9                                                                                                                                   |    |        |      |             | 4.02 | 2 | 20 |
| S2M/10                                                                                                                                  |    |        |      |             | 4.13 | 1 | 21 |
| <b>3' UTR stem-loop II-like motif, secondary structure using chemical reactivity from Manfredonia, et al.<sup>2</sup> (29724–29773)</b> |    |        |      |             |      |   |    |
| <b>S2M/1</b>                                                                                                                            | 50 | 500000 | 2.68 | 5.86 ± 0.65 | 0    | 1 | 1  |
| S2M/2                                                                                                                                   |    |        |      |             | 1.14 | 3 | 1  |
| S2M/3                                                                                                                                   |    |        |      |             | 2.93 | 1 | 3  |
| S2M/4                                                                                                                                   |    |        |      |             | 4.6  | 1 | 1  |
| S2M/5                                                                                                                                   |    |        |      |             | 5.3  | 2 | 2  |
| S2M/6                                                                                                                                   |    |        |      |             | 5.32 | 1 | 4  |
| S2M/7                                                                                                                                   |    |        |      |             | 5.51 | 2 | 1  |
| S2M/8                                                                                                                                   |    |        |      |             | 5.8  | 1 | 1  |
| S2M/9                                                                                                                                   |    |        |      |             | 5.97 | 2 | 2  |
| S2M/10                                                                                                                                  |    |        |      |             | 6.38 | 1 | 4  |
| <b>3' UTR stem-loop II-like motif, secondary structure using chemical reactivity from Huston, et al.<sup>3</sup> (29724–29773)</b>      |    |        |      |             |      |   |    |
| <b>S2M/1</b>                                                                                                                            | 50 | 500000 | 2.74 | 5.91 ± 0.47 | 0    | 1 | 2  |
| S2M/2                                                                                                                                   |    |        |      |             | 0.19 | 1 | 5  |
| S2M/3                                                                                                                                   |    |        |      |             | 0.86 | 1 | 1  |
| S2M/4                                                                                                                                   |    |        |      |             | 0.94 | 1 | 1  |
| S2M/5                                                                                                                                   |    |        |      |             | 1.2  | 1 | 2  |
| S2M/6                                                                                                                                   |    |        |      |             | 1.27 | 1 | 3  |
| S2M/7                                                                                                                                   |    |        |      |             | 1.59 | 1 | 3  |
| S2M/8                                                                                                                                   |    |        |      |             | 1.61 | 1 | 1  |
| S2M/9                                                                                                                                   |    |        |      |             | 1.81 | 2 | 2  |
| S2M/10                                                                                                                                  |    |        |      |             | 2.23 | 1 | 3  |

<sup>a</sup>Mean pairwise all-heavy-atom RMSD between 10 lowest energy cluster centers.

<sup>b</sup>Predicted RMSD to true structure.

<sup>c</sup>Rosetta all-atom free energy gap of cluster's lowest energy model compared to lowest energy model discovered in run. REU = Rosetta energy units, calibrated so that 1.0 corresponds approximately to 1 k<sub>B</sub>T.

<sup>d</sup>Number of models that appear in each cluster. Clustering was carried out on top 400 models ranked by Rosetta all-atom free energy, based on 5.0 Å threshold, except for small RNAs (SL1-4, SL6-7, s2m), where 2.0 Å threshold was applied.

<sup>e</sup>Number of pockets predicted from fpocket for the cluster center decoy, using default settings for fpocket prediction.



**Table S4.** FARFAR2-Apo-Riboswitch models, extended data

| System/cluster                                                                  | Length | Models generated | Model convergence (Å) <sup>a</sup> | Predicted minimum RMSD (Å) <sup>b</sup> | E-gap to lowest energy model (REU) <sup>c</sup> | Cluster occupancy <sup>d</sup> | Number of pockets predicted <sup>e</sup> | RMSD to experimental structure with ligand bound |
|---------------------------------------------------------------------------------|--------|------------------|------------------------------------|-----------------------------------------|-------------------------------------------------|--------------------------------|------------------------------------------|--------------------------------------------------|
| <b>SAM-I riboswitch, RNA-Puzzle 4. PDB ID: 3V7E<sup>11</sup></b>                |        |                  |                                    |                                         |                                                 |                                |                                          |                                                  |
| <b>SAM-I/1</b>                                                                  | 126    | 5768             | 7.85                               | 10.05 ± 2.55                            | 0                                               | 99                             | 17                                       | 2.52                                             |
| SAM-I/2                                                                         |        |                  |                                    |                                         | 6.31                                            | 6                              | 16                                       | 10.76                                            |
| SAM-I/3                                                                         |        |                  |                                    |                                         | 8.03                                            | 211                            | 19                                       | 8.23                                             |
| SAM-I/4                                                                         |        |                  |                                    |                                         | 18.34                                           | 2806                           | 17                                       | 9.68                                             |
| SAM-I/5                                                                         |        |                  |                                    |                                         | 25.9                                            | 362                            | 16                                       | 9.72                                             |
| SAM-I/6                                                                         |        |                  |                                    |                                         | 26.8                                            | 22                             | 16                                       | 14.83                                            |
| SAM-I/7                                                                         |        |                  |                                    |                                         | 28.76                                           | 1                              | 18                                       | 17.10                                            |
| SAM-I/8                                                                         |        |                  |                                    |                                         | 29.06                                           | 282                            | 15                                       | 11.90                                            |
| SAM-I/9                                                                         |        |                  |                                    |                                         | 39.12                                           | 140                            | 18                                       | 8.07                                             |
| SAM-I/10                                                                        |        |                  |                                    |                                         | 39.77                                           | 588                            | 19                                       | 11.33                                            |
| <b>SAM-I/IV riboswitch, RNA-Puzzle 8. PDB ID: 4L81<sup>12</sup></b>             |        |                  |                                    |                                         |                                                 |                                |                                          |                                                  |
| <b>SAM-I/IV/1</b>                                                               | 96     | 33086            | 9.76                               | 11.60 ± 2.88                            | 0                                               | 4                              | 11                                       | 8.83                                             |
| SAM-I/IV/2                                                                      |        |                  |                                    |                                         | 1.77                                            | 7                              | 16                                       | 11.18                                            |
| SAM-I/IV/3                                                                      |        |                  |                                    |                                         | 2.75                                            | 19                             | 16                                       | 10.98                                            |
| SAM-I/IV/4                                                                      |        |                  |                                    |                                         | 3.65                                            | 15                             | 14                                       | 5.23                                             |
| SAM-I/IV/5                                                                      |        |                  |                                    |                                         | 5.16                                            | 4                              | 14                                       | 9.62                                             |
| SAM-I/IV/6                                                                      |        |                  |                                    |                                         | 5.99                                            | 2                              | 14                                       | 12.25                                            |
| SAM-I/IV/7                                                                      |        |                  |                                    |                                         | 6.84                                            | 1                              | 12                                       | 7.69                                             |
| SAM-I/IV/8                                                                      |        |                  |                                    |                                         | 8.78                                            | 2                              | 17                                       | 7.44                                             |
| SAM-I/IV/9                                                                      |        |                  |                                    |                                         | 9.07                                            | 15                             | 14                                       | 5.36                                             |
| SAM-I/IV/10                                                                     |        |                  |                                    |                                         | 9.21                                            | 1                              | 13                                       | 14.13                                            |
| <b>SAM-IV riboswitch, RNA-Puzzle Unknown Rfam 15. PDB ID: 6UET<sup>13</sup></b> |        |                  |                                    |                                         |                                                 |                                |                                          |                                                  |
| <b>SAM-IV/1</b>                                                                 | 119    | 10828            | 8.43                               | 10.52 ± 2.39                            | 0                                               | 4                              | 21                                       | 7.61                                             |
| SAM-IV/2                                                                        |        |                  |                                    |                                         | 2.16                                            | 6                              | 19                                       | 3.70                                             |
| SAM-IV/3                                                                        |        |                  |                                    |                                         | 8.44                                            | 3                              | 16                                       | 6.04                                             |

|                                                                      |     |       |       |              |       |   |    |       |
|----------------------------------------------------------------------|-----|-------|-------|--------------|-------|---|----|-------|
| SAM-IV/4                                                             |     |       |       |              | 10.13 | 8 | 33 | 11.37 |
| SAM-IV/5                                                             |     |       |       |              | 10.15 | 1 | 18 | 9.55  |
| SAM-IV/6                                                             |     |       |       |              | 12.88 | 3 | 18 | 7.03  |
| SAM-IV/7                                                             |     |       |       |              | 14.4  | 3 | 18 | 8.68  |
| SAM-IV/8                                                             |     |       |       |              | 14.72 | 1 | 17 | 8.51  |
| SAM-IV/9                                                             |     |       |       |              | 17.51 | 2 | 14 | 8.01  |
| SAM-IV/10                                                            |     |       |       |              | 17.94 | 2 | 17 | 6.28  |
| <b>Glycine riboswitch, RNA-Puzzle 3. PDB ID: 3OXE<sup>14</sup></b>   |     |       |       |              |       |   |    |       |
| <b>Gly/1</b>                                                         | 84  | 33442 | 12.14 | 13.53 ± 2.13 | 0     | 1 | 9  | 17.96 |
| Gly/2                                                                |     |       |       |              | 1.53  | 1 | 10 | 17.86 |
| Gly/3                                                                |     |       |       |              | 3.87  | 1 | 12 | 21.51 |
| Gly/4                                                                |     |       |       |              | 7.46  | 1 | 12 | 12.41 |
| Gly/5                                                                |     |       |       |              | 7.76  | 1 | 13 | 14.54 |
| Gly/6                                                                |     |       |       |              | 7.79  | 1 | 10 | 18.93 |
| Gly/7                                                                |     |       |       |              | 8.2   | 1 | 11 | 16.66 |
| Gly/8                                                                |     |       |       |              | 10.03 | 1 | 13 | 19.75 |
| Gly/9                                                                |     |       |       |              | 10.71 | 1 | 12 | 15.60 |
| Gly/10                                                               |     |       |       |              | 10.89 | 1 | 9  | 17.17 |
| <b>Cobalamin riboswitch, RNA-Puzzle 6. PDB ID: 4GXY<sup>15</sup></b> |     |       |       |              |       |   |    |       |
| <b>Cobalamin/1</b>                                                   | 158 | 28859 | 14.97 | 15.81 ± 2.42 | 0     | 1 | 28 | 20.39 |
| Cobalamin/2                                                          |     |       |       |              | 0.47  | 1 | 23 | 13.08 |
| Cobalamin/3                                                          |     |       |       |              | 2.41  | 1 | 25 | 24.45 |
| Cobalamin/4                                                          |     |       |       |              | 4.14  | 1 | 23 | 19.51 |
| Cobalamin/5                                                          |     |       |       |              | 4.84  | 1 | 19 | 17.94 |
| Cobalamin/6                                                          |     |       |       |              | 6.1   | 1 | 19 | 24.51 |
| Cobalamin/7                                                          |     |       |       |              | 7.48  | 1 | 22 | 19.98 |
| Cobalamin/8                                                          |     |       |       |              | 9.07  | 1 | 27 | 25.93 |
| Cobalamin/9                                                          |     |       |       |              | 9.74  | 1 | 28 | 19.14 |
| Cobalamin/10                                                         |     |       |       |              | 11.56 | 1 | 23 | 16.42 |
| <b>5HT riboswitch, RNA-Puzzle 9. PDB ID: 5KPY<sup>16</sup></b>       |     |       |       |              |       |   |    |       |

|                                                                  |     |       |       |              |       |    |    |       |
|------------------------------------------------------------------|-----|-------|-------|--------------|-------|----|----|-------|
| <b>5HT/1</b>                                                     | 71  | 18660 | 7.89  | 10.08 ± 2.24 | 0     | 44 | 13 | 4.56  |
| 5HT/2                                                            |     |       |       |              | 1.39  | 27 | 12 | 10.12 |
| 5HT/3                                                            |     |       |       |              | 2.43  | 32 | 11 | 6.97  |
| 5HT/4                                                            |     |       |       |              | 7.14  | 12 | 8  | 6.54  |
| 5HT/5                                                            |     |       |       |              | 7.91  | 32 | 14 | 5.29  |
| 5HT/6                                                            |     |       |       |              | 9.4   | 9  | 12 | 6.99  |
| 5HT/7                                                            |     |       |       |              | 9.81  | 16 | 11 | 9.59  |
| 5HT/8                                                            |     |       |       |              | 9.87  | 10 | 16 | 9.37  |
| 5HT/9                                                            |     |       |       |              | 10    | 21 | 9  | 6.92  |
| 5HT/10                                                           |     |       |       |              | 10.44 | 6  | 12 | 10.81 |
| <b>ydaO riboswitch, RNA-Puzzle 12. PDB ID: 4QLM<sup>17</sup></b> |     |       |       |              |       |    |    |       |
| <b>ydaO/1</b>                                                    | 117 | 35506 | 21.19 | 20.86 ± 2.43 | 0     | 1  | 23 | 23.35 |
| ydaO/2                                                           |     |       |       |              | 1.66  | 1  | 18 | 16.62 |
| ydaO/3                                                           |     |       |       |              | 4.02  | 1  | 15 | 17.26 |
| ydaO/4                                                           |     |       |       |              | 5.53  | 1  | 20 | 18.62 |
| ydaO/5                                                           |     |       |       |              | 7.2   | 1  | 17 | 14.28 |
| ydaO/6                                                           |     |       |       |              | 7.21  | 1  | 20 | 18.13 |
| ydaO/7                                                           |     |       |       |              | 7.4   | 1  | 13 | 16.90 |
| ydaO/8                                                           |     |       |       |              | 7.75  | 1  | 18 | 13.32 |
| ydaO/9                                                           |     |       |       |              | 8.13  | 1  | 18 | 16.23 |
| ydaO/10                                                          |     |       |       |              | 9.54  | 1  | 15 | 19.93 |
| <b>ZMP riboswitch, RNA-Puzzle 13. PDB ID: 4XW7<sup>18</sup></b>  |     |       |       |              |       |    |    |       |
| <b>ZMP/1</b>                                                     | 60  | 20297 | 10.45 | 12.16 ± 1.94 | 0     | 1  | 4  | 16.19 |
| ZMP/2                                                            |     |       |       |              | 1.07  | 1  | 5  | 10.97 |
| ZMP/3                                                            |     |       |       |              | 2.07  | 1  | 7  | 13.30 |
| ZMP/4                                                            |     |       |       |              | 2.79  | 1  | 7  | 16.25 |
| ZMP/5                                                            |     |       |       |              | 3.88  | 2  | 4  | 11.43 |
| ZMP/6                                                            |     |       |       |              | 4.33  | 3  | 8  | 13.83 |
| ZMP/7                                                            |     |       |       |              | 6.29  | 1  | 7  | 7.13  |
| ZMP/8                                                            |     |       |       |              | 7.26  | 2  | 5  | 14.76 |
| ZMP/9                                                            |     |       |       |              | 7.8   | 1  | 8  | 10.62 |

|                                                                               |    |       |       |              |      |    |    |              |
|-------------------------------------------------------------------------------|----|-------|-------|--------------|------|----|----|--------------|
| ZMP/10                                                                        |    |       |       |              | 8.03 | 1  | 6  | 12.43        |
| <b>Glutamine riboswitch (bound), RNA-Puzzle 14. PDB ID: 5DDP<sup>19</sup></b> |    |       |       |              |      |    |    |              |
| <b>Gln (bound)/1</b>                                                          | 61 | 24531 | 11.97 | 13.39 ± 3.48 | 0    | 3  | 4  | 10.93        |
| Gln (bound)/2                                                                 |    |       |       |              | 1.34 | 2  | 5  | 11.71        |
| Gln (bound)/3                                                                 |    |       |       |              | 1.45 | 1  | 4  | 6.88         |
| Gln (bound)/4                                                                 |    |       |       |              | 5.31 | 5  | 6  | 11.96        |
| Gln (bound)/5                                                                 |    |       |       |              | 6.21 | 2  | 8  | 10.85        |
| Gln (bound)/6                                                                 |    |       |       |              | 7.27 | 1  | 7  | 10.28        |
| Gln (bound)/7                                                                 |    |       |       |              | 7.78 | 1  | 10 | 16.11        |
| Gln (bound)/8                                                                 |    |       |       |              | 8.28 | 8  | 8  | 11.33        |
| Gln (bound)/9                                                                 |    |       |       |              | 9.24 | 2  | 6  | 13.41        |
| Gln (bound)/10                                                                |    |       |       |              | 9.64 | 1  | 8  | 10.02        |
| <b>Guanidinium riboswitch, RNA-Puzzle 21. PDB ID: 5NWQ<sup>20</sup></b>       |    |       |       |              |      |    |    |              |
| <b>Guanidine/1</b>                                                            | 41 | 48146 | 9.26  | 11.19 ± 1.76 | 0    | 21 | 3  | Guanidine/1  |
| Guanidine/2                                                                   |    |       |       |              | 1.98 | 10 | 4  | Guanidine/2  |
| Guanidine/3                                                                   |    |       |       |              | 7.02 | 62 | 6  | Guanidine/3  |
| Guanidine/4                                                                   |    |       |       |              | 7.06 | 24 | 7  | Guanidine/4  |
| Guanidine/5                                                                   |    |       |       |              | 7.5  | 11 | 3  | Guanidine/5  |
| Guanidine/6                                                                   |    |       |       |              | 8.66 | 48 | 9  | Guanidine/6  |
| Guanidine/7                                                                   |    |       |       |              | 8.94 | 10 | 4  | Guanidine/7  |
| Guanidine/8                                                                   |    |       |       |              | 9.02 | 16 | 8  | Guanidine/8  |
| Guanidine/9                                                                   |    |       |       |              | 9.34 | 19 | 6  | Guanidine/9  |
| Guanidine/10                                                                  |    |       |       |              | 9.77 | 6  | 9  | Guanidine/10 |

<sup>a</sup>Mean pairwise all-heavy-atom RMSD between 10 lowest energy cluster centers.

<sup>b</sup>Predicted RMSD to true structure.

<sup>c</sup>Rosetta all-atom free energy gap of cluster's lowest energy model compared to lowest energy model discovered in run. REU = Rosetta energy units, calibrated so that 1.0 corresponds approximately to 1 k<sub>B</sub>T.

<sup>d</sup>Number of models that appear in each cluster. Clustering was carried out on top 400 models ranked by Rosetta all-atom free energy, based on 5.0 Å threshold.

<sup>e</sup>Number of pockets predicted from fpocket for the cluster center decoy, using default settings for fpocket prediction.

**Table S5.** Primers used in this study.

| <b>Name</b>                                | <b>Purpose</b>                                                                    | <b>Sequence (5' to 3')</b>                                                                                                                                                                                                                                                                                                                                                                                                                                                                                                                                                                         |
|--------------------------------------------|-----------------------------------------------------------------------------------|----------------------------------------------------------------------------------------------------------------------------------------------------------------------------------------------------------------------------------------------------------------------------------------------------------------------------------------------------------------------------------------------------------------------------------------------------------------------------------------------------------------------------------------------------------------------------------------------------|
| Extended 5' UTR gBlock                     | DNA template for regions in the extended 5' UTR                                   | TTCTAATACGACTCACTATTATTAAGGTTTATACCT<br>TCCCAGGTAACAAACCAACCAACTTTTCGATCTCTTGT<br>AGATCTGTTCTCTAAACGAACTTTAAAATCTGTGTGG<br>CTGTCACCTCGGCTGCATGCTTAGTGCACCTCACGCAGT<br>ATAATTAATAACTAATTACTGTGCTTGACAGGACACG<br>AGTAACTCGTCTATCTTCTGCAGGCTGCTTACGGTTT<br>CGTCCGTGTTGCAGCCGATCATCAGCACATCTAGGTT<br>TCGTCCGGGTGTGACCGAAAGGTAAGATGGAGAGCCT<br>TGTCCCTGGTTTCAACGAGAAAACACACGTCCAACCTC<br>AGTTTGCCTGTTTTACAGGTTTCGCGACGTGCTCGTAC<br>GTGGCTTTGGAGACTCCGTGGAGGAGGTCTTATCAGA<br>GGCACGTCAACATCTTAAAGATGGCACTTGTGGCTTA<br>GTAGAAGTTGAAAAAGGCGTTTTGCCTCAACTTGAAC<br>AGCCCTATGTGTTTCATCAAACGTTTCGGATGCTCGAACTG |
| 3' UTR gBlock                              | DNA template for regions in the 3' UTR                                            | TTCTAATACGACTCACTATTTGAAACTCAAGCCTTAC<br>CGCAGAGACAGAAGAAACAGCAAACCTGTGACTCTTC<br>TTCTGCTGCAGATTTGGATGATTTCTCCAACAATT<br>GCAACAATCCATGAGCAGTGCTGACTCAACTCAGGC<br>CTAAACTCATGCAGACCACACAAGGCAGATGGGCTA<br>TATAAACGTTTTTCGCTTTTCCGTTTACGATATATAGTC<br>TACTCTTGTGCAGAATGAATTCTCGTAACTACATAGC<br>ACAAGTAGATGTAGTTAACTTTAATCTCACATAGCAAT<br>CTTTAATCAGTGTGTAACATTAGGGAGGACTTGAAAG<br>AGCCACCACATTTTCACCGAGGCCACGCGGAGTACG<br>ATCGAGTGTACAGTGAACAATGCTAGGGAGAGCTGC<br>CTATATGGAAGAGCCCTAATGTGTAATAAATTTTA<br>GTAGTGCTATCCCCATGTGATTTTAATAGCTTCTTAG<br>GAGAATGAC                                          |
| SL1-4 Forward Primer                       | PCR amplification for SL1-4 from 5' UTR gBlock                                    | TTCTAATACGACTCACTATTATTAAGGTTTATACC                                                                                                                                                                                                                                                                                                                                                                                                                                                                                                                                                                |
| SL1-4 Reverse Primer                       | PCR amplification for SL1-4 from 5' UTR gBlock                                    | GTTGTTGTTGTTGTTTCTTTCAGTAATTAGTTATTAATT<br>ATACTGCGTGAGTGC                                                                                                                                                                                                                                                                                                                                                                                                                                                                                                                                         |
| Reverse complement of SL1-4 Forward Primer | PCR amplification for reverse complement of SL1-4 from 5' UTR gBlock              | TTCTAATACGACTCACTATTCAGTAATTAGTTATTAATT<br>ATACTGCG                                                                                                                                                                                                                                                                                                                                                                                                                                                                                                                                                |
| Reverse complement of SL1-4 Reverse Primer | PCR amplification for reverse complement of SL1-4 from 5' UTR gBlock              | ATTAAAGGTTTATACCTTCCCAGG                                                                                                                                                                                                                                                                                                                                                                                                                                                                                                                                                                           |
| SL2-6_T7_CM-1F                             | DNA primer for PCR assembly of SL2-6 with 5' and 3' flanking "reference hairpins" | TTCTAATACGACTCACTATAGGGTCAGCGAGTAGCTG<br>ACAACGATCTCTTGTAGATCTGTTCTCTAAACGAACTT<br>TAAAATCTGTGTGGC                                                                                                                                                                                                                                                                                                                                                                                                                                                                                                 |

|                                      |                                                                                   |                                                                                                                                               |
|--------------------------------------|-----------------------------------------------------------------------------------|-----------------------------------------------------------------------------------------------------------------------------------------------|
| SL2-6_T7_CM-2R                       | DNA primer for PCR assembly of SL2-6 with 5' and 3' flanking "reference hairpins" | GCAGCCGAGTGACAGCCACACAGATTT                                                                                                                   |
| SL2-6_T7_CM-3F                       | DNA primer for PCR assembly of SL2-6 with 5' and 3' flanking "reference hairpins" | ACTCGGCTGCATGCTTAGTGCACTCACGCAGTATAAT<br>TAATAACTAATTACTGTCGTTGACAGGACACGAGTAAC<br>TCGTCT                                                     |
| SL2-6_T7_CM-4R                       | DNA primer for PCR assembly of SL2-6 with 5' and 3' flanking "reference hairpins" | CCCGGACGAAACCTAGATGTGCTGATGATCGGCTGCA<br>ACACGGACGAAACCGTAAGCAGCCTGCAGAAGATAGA<br>CGAGTTACTCGTGTCTT                                           |
| SL2-6_T7_CM-5F                       | DNA primer for PCR assembly of SL2-6 with 5' and 3' flanking "reference hairpins" | TTCGTCCGGGTGTGACCGAAAGGTAAGATGGAGAGCC<br>TTGTCCCTGGTTTCAACGAGAAAACACACGTCCAACCTC<br>AGTTTGCC                                                  |
| SL2-6_T7_CM-6R                       | DNA primer for PCR assembly of SL2-6 with 5' and 3' flanking "reference hairpins" | GTTGTTGTTGTTGTTTCTTTGTGTCAGCTACTCGCTGAC<br>TTCACGTGCGGAACCTGTAAAACAGGCCAACTGAGTTGG                                                            |
| Hyper-variable region Forward Primer | PCR amplification for hyper-variable region from 3' UTR gBlock                    | TTCTAATACGACTCACTATTCTTTAATCTCACATAGCA<br>ATCTTTAATC                                                                                          |
| Hyper-variable region Reverse Primer | PCR amplification for hyper-variable region from 3' UTR gBlock                    | GTTGTTGTTGTTGTTTCTTTTATTAATAACACATGGG<br>GATAGCACTAC                                                                                          |
| FAM-A20-Tail2                        | RNA extraction and cDNA labeling                                                  | /56-FAM/AAAAAAAAAAAAAAAAAAAAAAAAAGTTGTTGTTGTTGTTTCTTT                                                                                         |
| RTB000                               | RT primer for no-modification sample                                              | /56-FAM/AATGATACGGCGACCACCGAGATCTACACTC<br>TTTCCCTACACGACGCTCTTCCGATCTACCAGGCGCT<br>GGTGTGTTGTTGTTGTTTCTTT                                    |
| RTB001                               | RT primer for 1M7 modification sample                                             | /56-FAM/AATGATACGGCGACCACCGAGATCTACACTCTTT<br>CCCTACACGACGCTCTTCCGATCTGAGGCCTTGG<br>CCGTTGTTGTTGTTGTTTCTTT                                    |
| pA-Adapt-Bp                          | Linker ligated for Illumina sequencing                                            | /5Phos/AGATCGGAAGAGCGGTTCAGCAGGAATGCC<br>GAGACCGATCTCGTATGCCGTCTTCTGCTTG/3Phos/                                                               |
| Eterna Construct 1, ID 9850089       | Eterna construct for chemical mapping of genomic positions 45-107                 | TTCTAATACGACTCACTATAGGAAAGATCTCTTGTAG<br>ATCTGTTCTCTAAACGAACTTTAAAATCTGTGTGGCT<br>GTCACCTCGGCTGCAGCAGACGTTCCGCTCTGCAAAA<br>GAAACAACAACAACAAC  |
| Eterna Construct 2, ID 9849692       | Eterna construct for chemical mapping of genomic positions 76-136                 | TTCTAATACGACTCACTATAGGAAATTTAAAATCTGT<br>GTGGCTGTCACTCGGCTGCATGCTTAGTGCACTCACGCAG<br>TATAATTAACGTGGGCTTCCGGCTCGCGAAAAGAAAC<br>AACAACAACAACAAC |
| Eterna Construct 3, ID 9872605       | Eterna construct for chemical mapping of genomic positions 172-234                | TTCTAATACGACTCACTATAGGAAATCGTCTATCTT<br>CTGCAGGCTGCTTACGGTTTTCGTCCGTGTTGCAGC<br>CGATCATCAGCACATCTCCGAAGCTTCGGCTTCG<br>GAAAAGAAACAACAACAACAAC  |

|                                |                                                                        |                                                                                                                                              |
|--------------------------------|------------------------------------------------------------------------|----------------------------------------------------------------------------------------------------------------------------------------------|
| Eterna Construct 4, ID 9849874 | Eterna construct for chemical mapping of genomic positions 172-233     | TTCTAATACGACTCACTATAGGAAATCGTCTAT<br>CTTCTGCAGGCTGCTTACGGTTTCGTCCGTG<br>TTGCAGCCGATCATCAGCACATCAGCAGCTGT<br>TCGCAGCTGCAAAGAAACAACAACAACAAC   |
| Eterna Construct 5, ID 9872974 | Eterna construct for chemical mapping of genomic positions 217-277     | TTCTAATACGACTCACTATAGGAAACCGATCAT<br>CAGCACATCTAGGTTTCGTCCGGGTGTGACCG<br>AAAGGTAAGATGGAGAGCATTAAAGCGGGTCTT<br>CGGGCCTGCAAAGAAACAACAACAACAAC  |
| Eterna Construct 6, ID 9872770 | Eterna construct for chemical mapping of genomic positions 13472-13529 | TTCTAATACGACTCACTATAGGAAAGATTTGCGG<br>TGTAAGTGCAGCCCGTCTTACACCGTGCGGCAC<br>AGGCACTAGTACTGATGTAAACGGCGGCTTCGG<br>TCGTTGAAAAGAAACAACAACAACAAC  |
| Eterna Construct 7, ID 9873087 | Eterna construct for chemical mapping of genomic positions 29720-29776 | TTCTAATACGACTCACTATAGGAAAAGAGACACC<br>ACATTTTCACCGAGGCCACGCGGAGTACGATCG<br>AGTGTACAGTGAACAATGCTACGATACGTTTCGC<br>GTATCGAAAAGAAACAACAACAACAAC |

## Supplemental References

1. Zhang, K.; Zheludev, I. N.; Hagey, R. J.; Wu, M. T.; Haslecker, R.; Hou, Y. J.; Kretsch, R.; Pintilie, G. D.; Rangan, R.; Kladwang, W.; Li, S.; Pham, E. A.; Bernardin-Souibgui, C.; Baric, R. S.; Sheahan, T. P.; V, D. S.; Glenn, J. S.; Chiu, W.; Das, R., Cryo-electron Microscopy and Exploratory Antisense Targeting of the 28-kDa Frameshift Stimulation Element from the SARS-CoV-2 RNA Genome. *bioRxiv* **2020**.
2. Manfredonia, I.; Nithin, C.; Ponce-Salvatierra, A.; Ghosh, P.; Wirecki, T. K.; Marinus, T.; Ogando, N. S.; Snijder, E. J.; van Hemert, M. J.; Bujnicki, J. M.; Incarnato, D., Genome-wide mapping of SARS-CoV-2 RNA structures identifies therapeutically-relevant elements. *Nucleic Acids Res* **2020**.
3. Huston, N. C.; Wan, H.; Araujo Tavares, R. C.; Wilen, C.; Pyle, A. M., Comprehensive in-vivo secondary structure of the SARS-CoV-2 genome reveals novel regulatory motifs and mechanisms. *bioRxiv* **2020**.
4. Lan, T. C. T.; Allan, M. F.; Malsick, L. E.; Khandwala, S.; Nyeo, S. S. Y.; Bathe, M.; Griffiths, A.; Rouskin, S., Structure of the full SARS-CoV-2 RNA genome in infected cells. *bioRxiv* **2020**.
5. Iserman, C.; Roden, C.; Boerneke, M.; Sealfon, R.; McLaughlin, G.; Jungreis, I.; Park, C.; Boppana, A.; Fritch, E.; Hou, Y. J.; Theesfeld, C.; Troyanskaya, O. G.; Baric, R. S.; Sheahan, T. P.; Weeks, K.; Gladfelter, A. S., Specific viral RNA drives the SARS CoV-2 nucleocapsid to phase separate. *Mol. Cell, in press* **2020**.
6. Rangan, R.; Zheludev, I. N.; Das, R., RNA genome conservation and secondary structure in SARS-CoV-2 and SARS-related viruses. *bioRxiv* **2020**.
7. Sun, L.; Li, P.; Ju, X.; Rao, J.; Huang, W.; Zhang, S.; Xiong, T.; Xu, K.; Zhou, X.; Ren, L.; Ding, Q.; Wang, J.; Zhang, Q. C., In vivo structural characterization of the whole SARS-CoV-2 RNA genome identifies host cell target proteins vulnerable to re-purposed drugs. *bioRxiv* **2020**.
8. Kelly, J. A.; Dinman, J. D., Structural and functional conservation of the programmed -1 ribosomal frameshift signal of SARS-CoV-2. *bioRxiv* **2020**.
9. Wacker, A.; Weigand, J. E.; Akabayov, S. R.; Altincekic, N.; Bains, J. K.; Banijamali, E.; Binas, O.; Castillo-Martinez, J.; Cetiner, E.; Ceylan, B.; Chiu, L. Y.; Davila-Calderon, J.; Dhamotharan, K.; Duchardt-Ferner, E.; Ferner, J.; Frydman, L.; Furtig, B.; Gallego, J.; Grun, J. T.; Hacker, C.; Haddad, C.; Hahnke, M.; Hengesbach, M.; Hiller, F.; Hohmann, K. F.; Hyman, D.; de Jesus, V.; Jonker, H.; Keller, H.; Knezic, B.; Landgraf, T.; Lohr, F.; Luo, L.; Mertinkus, K. R.; Muhs, C.; Novakovic, M.; Oxenfarth, A.; Palomino-Schatzlein, M.; Petzold, K.; Peter, S. A.; Pyper, D. J.; Qureshi, N. S.; Riad, M.; Richter, C.; Saxena, K.; Schamber, T.; Scherf, T.; Schlagnitweit, J.; Schlundt, A.; Schnieders, R.; Schwalbe, H.; Simba-Lahuasi, A.; Sreeramulu, S.; Stirnal, E.; Sudakov, A.; Tants, J. N.; Tolbert, B. S.; Vogele, J.; Weiss, L.; Wirmer-Bartoschek, J.; Wirtz Martin, M. A.; Wohnert, J.; Zetzsche, H., Secondary structure determination of conserved SARS-CoV-2 RNA elements by NMR spectroscopy. *Nucleic Acids Res* **2020**.
10. Robertson, M. P.; Igel, H.; Baertsch, R.; Haussler, D.; Ares, M., Jr.; Scott, W. G., The structure of a rigorously conserved RNA element within the SARS virus genome. *PLoS Biol.* **2005**, *3* (1), e5.
11. Baird, N. J.; Zhang, J.; Hamma, T.; Ferre-D'Amare, A. R., YbxF and YlxQ are bacterial homologs of L7Ae and bind K-turns but not K-loops. *RNA* **2012**, *18* (4), 759-70.



12. Trausch, J. J.; Xu, Z.; Edwards, A. L.; Reyes, F. E.; Ross, P. E.; Knight, R.; Batey, R. T., Structural basis for diversity in the SAM clan of riboswitches. *Proc Natl Acad Sci U S A* **2014**, *111* (18), 6624-9.
13. Zhang, K.; Li, S.; Kappel, K.; Pintilie, G.; Su, Z.; Mou, T. C.; Schmid, M. F.; Das, R.; Chiu, W., Cryo-EM structure of a 40 kDa SAM-IV riboswitch RNA at 3.7 Å resolution. *Nat Commun* **2019**, *10* (1), 5511.
14. Huang, L.; Serganov, A.; Patel, D. J., Structural insights into ligand recognition by a sensing domain of the cooperative glycine riboswitch. *Mol Cell* **2010**, *40* (5), 774-86.
15. Peselis, A.; Serganov, A., Structural insights into ligand binding and gene expression control by an adenosylcobalamin riboswitch. *Nat Struct Mol Biol* **2012**, *19* (11), 1182-4.
16. Porter, E. B.; Polaski, J. T.; Morck, M. M.; Batey, R. T., Recurrent RNA motifs as scaffolds for genetically encodable small-molecule biosensors. *Nat Chem Biol* **2017**, *13* (3), 295-301.
17. Ren, A.; Patel, D. J., c-di-AMP binds the ydaO riboswitch in two pseudo-symmetry-related pockets. *Nat Chem Biol* **2014**, *10* (9), 780-6.
18. Trausch, J. J.; Marcano-Velazquez, J. G.; Matyjasik, M. M.; Batey, R. T., Metal Ion-Mediated Nucleobase Recognition by the ZTP Riboswitch. *Chem Biol* **2015**, *22* (7), 829-37.
19. Ren, A.; Xue, Y.; Peselis, A.; Serganov, A.; Al-Hashimi, H. M.; Patel, D. J., Structural and Dynamic Basis for Low-Affinity, High-Selectivity Binding of L-Glutamine by the Glutamine Riboswitch. *Cell Rep* **2015**, *13* (9), 1800-13.
20. Huang, L.; Wang, J.; Wilson, T. J.; Lilley, D. M. J., Structure of the Guanidine III Riboswitch. *Cell Chem Biol* **2017**, *24* (11), 1407-1415 e2.
